# Supplementary material for: A Non-invasive Digital Biomarker for the Detection of Rest Disturbances in the SOD1G93A Mouse Model of ALS
Source: Front Neurosci. 2020 Sep 1;14:896. doi: 10.3389/fnins.2020.00896 (PMC7490341; doi:10.3389/fnins.2020.00896)
Supplement: Supplementary file 4 [file Data_Sheet_1.CSV]

cage_id	week	sex	strain	activity_day	activity_night	RDI_day	RDI_night	activity_least_active_h	RDI_least_active_h
cage_00	7	F	TG	0.00864117929606769	0.03777861577762113	0.2478637113819889	0.8112030055829127	0.00019890662671987424	0.11546911948818775
cage_00	8	F	TG	0.010479373969508415	0.03660478215125513	0.1424867023220326	0.868834521417047	2.9920962999578224e-05	0.0
cage_00	9	F	TG	0.008954959582798126	0.03596314730716464	0.15217858717723678	0.6754269395376842	2.8089638733466632e-05	0.0
cage_00	10	F	TG	0.009737550874796967	0.03593626747135361	0.15884217038640144	0.5943373702717719	4.013815909517881e-05	0.0
cage_00	11	F	TG	0.008624353411575216	0.03569807897197773	0.2194281416598177	0.598400380844119	0.00019047983308858327	0.060114210301181574
cage_00	12	F	TG	0.00986330908366618	0.03683344339397493	0.25036161745336394	0.6228260839832326	0.0003097624968645138	0.05909969367560916
cage_00	13	F	TG	0.011596491686024843	0.042362239232318154	0.3166746737988602	0.6635803640736209	0.0005411638162067992	0.21237988698870414
cage_00	14	F	TG	0.011182506180216654	0.041612746071992834	0.22753167077863998	0.6627753087870253	0.00016105979450560659	0.02004152135859616
cage_00	15	F	TG	0.009322325859102068	0.044811083119124455	0.21381952526163622	0.6055113646859204	0.00012562895903600607	0.0513884409028515
cage_00	16	F	TG	0.01058637814380575	0.04618105724090577	0.3910359634433877	0.609691176170098	0.0009672134867786883	0.22735060047111125
cage_00	17	F	TG	0.01342127719747567	0.049209621320292087	0.5673499762695956	0.8328560843187214	0.0016388042005818636	0.2176506223231836
cage_00	18	F	TG	0.012310547727220853	0.04381338081062626	0.6380793516946779	0.8955602719424872	0.002129339602189384	0.3013281012136623
cage_00	19	F	TG	0.010212520146730584	0.03573425364365318	0.9234158362808739	0.9857707308813835	0.003140702596163692	0.5775635418109359
cage_00	20	F	TG	0.013342815559089555	0.03754270353750378	0.998911519311556	1.0543986613145362	0.004889982907497173	0.5807782796076432
cage_00	21	F	TG	0.012364269947845742	0.03614579166336802	1.022016868697531	1.1106965889075258	0.004225496698947521	0.7139535607593989
cage_01	7	M	WT	0.017316672064427576	0.04462064523073075	0.27232050120339574	1.0151462232482802	0.00020773640627788336	0.0
cage_01	8	M	WT	0.015608137275322773	0.03337637771891109	0.287213471664094	0.7344605808911976	0.0004791643115656458	0.2502498561015241
cage_01	9	M	WT	0.0165248925539515	0.032371724105719715	0.353345849914579	0.8291829145307952	0.0004859942482834097	0.14890021602281334
cage_01	10	M	WT	0.013755265758055333	0.031183608971893078	0.30935377083612753	0.8146364340137764	0.00025324418052829345	0.0590254910954453
cage_01	11	M	WT	0.013618707802019597	0.03149924521993238	0.30077402230114714	0.638896226285353	0.00021926442614016278	0.03767495587273695
cage_01	12	M	WT	0.016400708079406887	0.03026194662154541	0.3728099874256112	0.6420589796179416	0.0007477961134372557	0.21040271701580074
cage_01	13	M	WT	0.01735603469690358	0.037828707659559535	0.3999938897692169	0.8082841284097315	0.0010240357370759202	0.1971579543828202
cage_01	14	M	WT	0.021035040026652102	0.038027741971774144	0.35930970886064356	0.7798000306132997	0.0007351133378772966	0.1449672628842371
cage_01	15	M	WT	0.01689902002166172	0.03468627209141521	0.34377403398546086	0.7103565937713646	0.0007063459663771651	0.1923812785991992
cage_01	16	M	WT	0.021152556424774024	0.033543131618677655	0.38345605103468416	0.6894530311772665	0.0011316549762473015	0.31039435683360805
cage_01	17	M	WT	0.017463309778097857	0.035176678271001335	0.3834955822314341	0.7534036118835495	0.0007264478677382544	0.16830198959716464
cage_01	18	M	WT	0.020956363909681527	0.03445553731447213	0.3201346118160712	0.5947699580006179	0.00077996642339413	0.3423259195442503
cage_01	19	M	WT	0.016893999933505027	0.032550736474253356	0.36333427586447353	0.6871045921413642	0.0007563307811667217	0.0872523071545116
cage_01	20	M	WT	0.017147096889270876	0.02687716358136926	0.3634691777933404	0.5859742393490202	0.0005088774474964915	0.11292171894769774
cage_01	21	M	WT	0.016049338004308463	0.03009784116349656	0.40557051334723193	0.8805818956514259	0.0008406363144338251	0.3216734713454633
cage_02	7	M	TG	0.017795509689429344	0.05187161621644143	0.13553691916344565	0.7562487195054999	1.9468640714607452e-05	0.0
cage_02	8	M	TG	0.017961173338055407	0.03932095288430243	0.15453432197148784	0.7225035393936522	3.997272262502373e-05	0.0
cage_02	9	M	TG	0.019423203183584477	0.034735011431395034	0.1411906763355182	0.5156518995484068	0.00010229848828152612	0.00724751865662313
cage_02	10	M	TG	0.020756074740178897	0.0369215832864556	0.16635002874028673	0.5454327836189183	3.544290948443395e-05	0.0
cage_02	11	M	TG	0.02005039262248448	0.037767340040568205	0.2900817172151238	0.6736232568359413	0.0003824495998203707	0.10654488632772403
cage_02	12	M	TG	0.022476691577575206	0.03445934858431917	0.34995440695003743	0.786878465635047	0.0008354436635608385	0.14511201026663065
cage_02	13	M	TG	0.023050500119835882	0.04177073983420321	0.4561464583514548	0.9132231688202967	0.0016074924824625492	0.4796502302597413
cage_02	14	M	TG	0.02066910211219946	0.03606132172947131	0.5301726290366966	0.9023352250970352	0.0020291640508166373	0.6302761183151372
cage_02	15	M	TG	0.01758638036130806	0.03534475928899724	0.5044237376513101	0.904281936892396	0.0014278849693203984	0.4030998152699506
cage_02	16	M	TG	0.019370744115739007	0.041291320380101866	0.5958280707154654	1.0229962010942	0.0032165712043925603	0.6068242323359754
cage_02	17	M	TG	0.021132652548514787	0.04424526693866347	1.000796138227655	1.003525075641568	0.007884595303400459	0.8039156422673753
cage_02	18	M	TG	0.021864705424287072	0.03809328834227684	1.142024475682813	1.106137469836283	0.009381658894659035	1.2537243483664195
cage_02	19	M	TG	0.01786051357858017	0.03223065255866598	1.1123127936292534	1.073985532430941	0.007725117837014485	1.1864281144855346
cage_02	20	M	TG	0.01639016150183469	0.02508470910533863	0.9522331140910608	1.030432540232688	0.005787305404202602	0.871019166125365
cage_03	7	F	WT	0.012456344080131137	0.048336192577595395	0.19524659006742573	1.18548799997753	6.609879854961881e-05	0.0
cage_03	8	F	WT	0.0103898932552621	0.050869665885119764	0.20582929076499562	1.0906510412017516	3.2401069750076913e-05	0.0
cage_03	9	F	WT	0.009189779780657024	0.04381755794293463	0.1482341771872823	0.9703410978475052	1.949326378465123e-06	0.0
cage_03	10	F	WT	0.0076818963634509106	0.05975464065013796	0.15094688725485167	1.1043066772801982	7.5135539447846635e-06	0.0
cage_03	11	F	WT	0.009382355068572575	0.052849962019296995	0.19297286828300178	0.9143207861196586	9.949538560092212e-05	0.0
cage_03	12	F	WT	0.01008881967286434	0.049257446791634955	0.16393954015030274	0.8920668370658407	3.404549818051927e-05	0.0
cage_03	13	F	WT	0.009732627865913737	0.05071211351264352	0.15586626289497593	0.7477348133019702	0.00019417434340802294	0.0334054388437635
cage_03	14	F	WT	0.009150645409604882	0.05420896832157366	0.1788097229696369	0.8696531746581486	0.00015093337086205638	0.04613709751188345
cage_03	15	F	WT	0.009173596447938163	0.049787565990092986	0.2357945169770636	0.9765326943396857	0.0003774083623577772	0.08639109673251193
cage_03	16	F	WT	0.008748318043616718	0.050515652526062944	0.21173410993159486	0.9200664677456994	0.00010808097998912878	0.051942661294441014
cage_03	17	F	WT	0.011052318431594698	0.047484908961038304	0.30317883825697145	0.7365191457800118	0.0005852400392030842	0.13843455096075713
cage_03	18	F	WT	0.00902809255857911	0.05253885462239601	0.17808688534006736	0.7950848759311052	0.00013361146904221442	0.0378861083324725
cage_03	19	F	WT	0.011387279137529238	0.05007728806593701	0.2024767874890275	0.694250302519853	0.00024738621685556307	0.04311238266190327
cage_03	20	F	WT	0.010083226407355277	0.0450517053741409	0.2508111712484973	0.6928711818427385	0.0005475227682290468	0.09961592965138844
cage_03	21	F	WT	0.010412756110887555	0.045043890920813276	0.2603088791193749	0.6742007207664589	0.0003571376004347748	0.13125936293056914
cage_04	7	F	WT	0.01635185164083191	0.05292238465745968	0.16944805007323938	1.2434093213622024	1.7631380872880002e-05	0.0
cage_04	8	F	WT	0.014352578336420091	0.049679677434897304	0.21396072088129017	1.1153515176686055	3.400675150332446e-05	0.0
cage_04	9	F	WT	0.015784376648084703	0.05473621582741373	0.19017704545629457	0.9820194694507869	9.433573221752286e-05	0.0060612740284791385
cage_04	10	F	WT	0.01672304567511169	0.059105981085919974	0.20943485950383356	1.0802189621861786	5.1881297135200376e-05	0.0
cage_04	11	F	WT	0.017115795580391224	0.05656445550544555	0.3224746055440183	0.9818998691460881	0.00053814609572189	0.1074814294291646
cage_04	12	F	WT	0.016605207872818044	0.06102222269084708	0.24363151587210258	0.894437487565163	0.00039359113066279725	0.03223518924155784
cage_04	13	F	WT	0.014693734569546119	0.054761904179783924	0.24120383595103526	0.8206730926408691	0.00014454880754645683	0.04692915242457658
cage_04	14	F	WT	0.017318166010609013	0.05350712432406753	0.2521462598138485	0.7793866995270274	0.00021396597207879318	0.04198216076669927
cage_04	15	F	WT	0.01794868762585553	0.07205131052494428	0.17411222693247488	0.9786663981760201	0.0001038436337197678	0.0068040069984649405
cage_04	16	F	WT	0.01772788516627648	0.06961028633720477	0.1773986767881475	0.9817795211301937	0.00016594109387284455	0.04976963523444264
cage_04	17	F	WT	0.019813368276198624	0.062197122864770096	0.24442159909554237	0.9483916680270957	0.0004899653276844338	0.061782066688171364
cage_04	18	F	WT	0.01609607062622449	0.06204598689953258	0.22992771786776073	0.8332503538068428	0.00019378894078918608	0.0291962494426484
cage_04	19	F	WT	0.012344124268780838	0.06396714531959745	0.2069543679092609	0.7826798638475732	0.00014250910546579934	0.017178446878796706
cage_04	20	F	WT	0.014909190461003903	0.05603219545680617	0.22815024471685794	0.8068001586985769	0.00041758257032596755	0.15159567402365104
cage_04	21	F	WT	0.013718620229544887	0.07205042802162995	0.22220179316057695	0.8926490768516965	0.00014169177444830282	0.0
cage_05	7	M	TG	0.012359743430693104	0.04290470540436131	0.16552347180092036	0.8633182414621642	7.567566621334696e-05	0.0
cage_05	8	M	TG	0.012832677735466926	0.03887561410099435	0.17424808670240033	0.7915449964558546	5.578520407736571e-05	0.0
cage_05	9	M	TG	0.011723741582436366	0.039946702102750566	0.16069671796757207	0.6766803391986078	0.00015147078136879355	0.010165752117140318
cage_05	10	M	TG	0.01240054364689567	0.055964448981326485	0.14774453743184382	0.808233812709542	6.241418179477032e-05	0.0
cage_05	11	M	TG	0.013020520247347647	0.048361352797964344	0.20726313862203044	0.7432842622903361	9.347261722927998e-05	0.025562494115673445
cage_05	12	M	TG	0.017659967020027905	0.045206219636650245	0.24191027816477523	0.8463484455107595	0.0001989105081437317	0.0
cage_05	13	M	TG	0.016539322506327676	0.04173178562337344	0.3822840408860858	0.8130155648837695	0.0008718356047572518	0.2817310037555922
cage_05	14	M	TG	0.019101186305163522	0.04598745194604894	0.32015813083516803	0.6809362597228056	0.0004548956547906792	0.08995447326051276
cage_05	15	M	TG	0.01586544789742315	0.04158790217863394	0.39752218820654345	0.8171574237944483	0.0007302651440942341	0.18368416494449136
cage_05	16	M	TG	0.022104094306735208	0.0454731250744207	0.4619665907723936	0.8558134674746734	0.0013983141747831336	0.43328298783593816
cage_05	17	M	TG	0.01758286049355767	0.04319123203444343	0.640929372176862	0.9082507433648958	0.0026804997920427684	0.5620293343487047
cage_05	18	M	TG	0.023600254337867516	0.0410871844895994	0.7304245523232534	1.0885528849147785	0.0035315934477985478	0.9040117276565356
cage_05	19	M	TG	0.016027788037059818	0.03207250077181386	0.923959457745573	1.0123243494980325	0.0038733096130967866	0.5188688021825085
cage_05	20	M	TG	0.014292633569237342	0.02489849636061364	0.9338591739049874	0.9054870781700519	0.0037267743564059225	0.8850589125790727
cage_05	21	M	TG	0.007565647519064981	0.015224019882350717	0.7301844782131541	1.0448311634738094	0.0010615232531083886	0.3008366963856253
cage_06	7	M	WT	0.011446428619120342	0.04174593531522878	0.1535925198729919	1.1108565998027757	6.82305270912866e-05	0.013607331506751722
cage_06	8	M	WT	0.010586860216300755	0.04446094235211801	0.1895664212161372	1.0909396301171097	1.572279472108248e-05	0.0
cage_06	9	M	WT	0.012039295576941183	0.04846054450272029	0.16227982375595998	1.0514472401503736	0.00011140781700060264	0.0216129705514221
cage_06	10	M	WT	0.012744582300807846	0.05071286179604752	0.27049342589039543	0.9416548412994912	0.0002634421950619587	0.014156362882641703
cage_06	11	M	WT	0.016520235611142957	0.04455148654069072	0.33109171053687186	1.004209758727122	0.0005073520493767965	0.09947120481587036
cage_06	12	M	WT	0.013026476216075259	0.03768256139385073	0.30683163336534897	0.9606520683957624	0.00025627625886835806	0.07063231309789962
cage_06	13	M	WT	0.013686559832662964	0.04961133920579822	0.25130568582562557	1.0100567125300592	0.0001695028525337679	0.04724360892459762
cage_06	14	M	WT	0.01899007064035375	0.04340235023827615	0.33121882368511596	0.7550828603946528	0.00042018174341482026	0.14332646383171674
cage_06	15	M	WT	0.018281840123078697	0.05116993540856207	0.36759942914846755	0.9392703496999378	0.0008406171769657067	0.30267213177062563
cage_06	16	M	WT	0.019893472864542034	0.0461956619685176	0.3385777928056158	0.9880772492485664	0.0009065590614079216	0.19999100914076015
cage_06	17	M	WT	0.0188466145504731	0.043768657886837925	0.3537536084505216	1.086615993062653	0.0006837168359424462	0.1523189568445747
cage_06	18	M	WT	0.018952122818867385	0.040268129723396225	0.31824301762976176	0.8605240993392393	0.0007138865349382383	0.1641679023348362
cage_06	19	M	WT	0.02133304862984112	0.04189160367737625	0.33151985856091537	0.9417902977485113	0.0005738862481810588	0.12085551219662463
cage_06	20	M	WT	0.018909808958615052	0.04068715651698832	0.3324429701379793	0.8802382995906873	0.0005325578516983643	0.13577287429577936
cage_06	21	M	WT	0.018488457222951428	0.044912995238262345	0.3408155450746953	0.894483658199401	0.000910984555178186	0.20859028186876927
cage_07	7	F	TG	0.01498622348537388	0.04902615296312386	0.27857696312773966	0.7594346265936097	0.00031289663458603775	0.057116839903033574
cage_07	8	F	TG	0.011391769839644943	0.04868647176086629	0.1655882733181307	0.9268780108824975	6.098054962740426e-05	0.0
cage_07	9	F	TG	0.01259785888349471	0.045550636221097576	0.2111257683372488	0.7374582287018285	0.00029318629953497063	0.11312640718464095
cage_07	10	F	TG	0.012153739685547034	0.0462953069985705	0.19046294191657082	0.5286744343763834	0.00038089888515082185	0.007894668382149916
cage_07	11	F	TG	0.012895873692717275	0.042037855482908136	0.3325394887585003	0.7541238006509042	0.0005037823470653048	0.09600155761649097
cage_07	12	F	TG	0.014915436011449337	0.045361982838910284	0.34346946159767505	0.46328407439747066	0.0008571897824711908	0.1165326378609201
cage_07	13	F	TG	0.012603286836612602	0.04977256998950935	0.29195314956443524	0.6052223719980621	0.0006353462523580737	0.1669039168660175
cage_07	14	F	TG	0.01728481025835239	0.05129364663163842	0.3896500156832798	0.5707610787219788	0.0010618813576587	0.2489947586194563
cage_07	15	F	TG	0.014683307940962629	0.0495904530123619	0.36607871318349555	0.5589185067205948	0.0009230234076522387	0.25920791762454176
cage_07	16	F	TG	0.017932922248757015	0.04919815509800625	0.5093541021595058	0.5608846894853047	0.0017210858779364918	0.2820610379577412
cage_07	17	F	TG	0.020389127672318843	0.06414007225182919	0.7290506337402067	0.9723744081865614	0.004307469486908297	0.8127224532743729
cage_07	18	F	TG	0.02390927229971555	0.051991350075063114	0.8523211855291842	0.9717094837612841	0.005298459134687131	0.8450187878394693
cage_07	19	F	TG	0.016758334020011218	0.04698571794322287	0.7726090927296887	0.8498157771662559	0.003367189805162243	0.5527537381351342
cage_07	20	F	TG	0.017794717049629438	0.04163465472228472	0.7740854683862954	0.8603377380448565	0.003945900034954046	0.9226348843098268
cage_07	21	F	TG	0.014578667677698809	0.03531077363924426	0.7802683077787327	1.0134034475261786	0.00302171742454707	0.5077063026510055
cage_08	7	F	WT	0.017449949243129537	0.06734976637909323	0.158484792614395	1.081568371854593	7.988043943631333e-05	0.0
cage_08	8	F	WT	0.014257080219269672	0.0554262102696788	0.19474883935947082	0.9640918438483898	7.448531048582279e-05	0.0
cage_08	9	F	WT	0.012674518545374271	0.055463819074156664	0.10657817766235166	1.0165976754580621	3.337280134439392e-05	0.0
cage_08	10	F	WT	0.013801888806379567	0.0565264253763411	0.28968050889700564	1.146020144538274	0.0005872951228862843	0.21333536586087765
cage_08	11	F	WT	0.01359689593840349	0.0542771296815731	0.29804607729640514	0.9266943090154942	0.000740742939795542	0.14288894777750358
cage_08	12	F	WT	0.01496200064894413	0.05323533233316977	0.3192303911926748	1.0086728149172208	0.0007635051937987388	0.14185642590095496
cage_08	13	F	WT	0.012098051796375948	0.058370024252190005	0.22907614700259596	0.9535246285122128	0.0005690446694945387	0.14334344921061448
cage_08	14	F	WT	0.013166176309087107	0.048319306354242454	0.2596140863712581	0.8202766647117947	0.00028096522843262404	0.0783391134678092
cage_08	15	F	WT	0.013696456792066698	0.04686616443489433	0.21417599146623106	0.8586532242429532	0.0004231020324533232	0.038293921081199465
cage_08	16	F	WT	0.012062915939916688	0.042809574025195765	0.25434740330430594	0.7812892249701691	0.0004712460440044302	0.14525379184891393
cage_08	17	F	WT	0.014778041540958872	0.04518358225189016	0.33993590480519525	0.6830073173714831	0.000991033291993613	0.17862959058866285
cage_08	18	F	WT	0.01229107993002862	0.04316463287395097	0.2276207767947343	0.631120065058208	0.0005384349368033854	0.1360394745506493
cage_08	19	F	WT	0.010196318400809827	0.041214173637680616	0.2014002666883008	0.5693703339802637	0.00023048670918410336	0.044327866169730834
cage_08	20	F	WT	0.009495451903220244	0.043935872363499995	0.23387839111441927	0.5589802674386338	0.00017354908545199482	0.03592859014385688
cage_08	21	F	WT	0.011227106108234517	0.04444275019183252	0.23693242553413524	0.5646364859165615	0.00035864147671249585	0.1186942240456483
cage_09	7	F	TG	0.006851896074147232	0.030734501746751082	0.12354507428163729	0.5208902228898634	3.137607304273971e-06	0.0
cage_09	8	F	TG	0.006617978763901136	0.026765159413041	0.13567959958365985	0.4518610395558294	5.9400720891539565e-05	0.0
cage_09	9	F	TG	0.00865672549115949	0.03177993032069522	0.12509778545700603	0.6261629289885455	1.5608923913587523e-05	0.0
cage_09	10	F	TG	0.008525540504149626	0.03433626133084705	0.14518846917593478	0.7077002798211193	1.032480893592005e-05	0.0
cage_09	11	F	TG	0.008480222022172202	0.0341872960601114	0.1513168404163069	0.49197310371730907	1.0380335492443115e-06	0.0
cage_09	12	F	TG	0.008492940126982736	0.03470486559846503	0.12735880691383844	0.5035032866083557	2.05761316872428e-06	0.0
cage_09	13	F	TG	0.00888253825821652	0.03604330026720216	0.11926364794715437	0.4157772836398144	5.2518061872916825e-06	0.0
cage_09	14	F	TG	0.009910427726604916	0.036253309116024916	0.14786304247576462	0.4570533252017509	3.043552008255321e-05	0.0
cage_09	15	F	TG	0.008961208969593263	0.026563944812755032	0.16072280480153647	0.39610075779882686	5.9697901685696914e-05	0.0
cage_09	16	F	TG	0.009338573996979835	0.03445728587883198	0.24385728040015606	0.4654366097703767	0.00020666875413381973	0.026452568163228832
cage_09	17	F	TG	0.0094301409410192	0.03148647001815232	0.45862690331393996	0.643355614464042	0.001205365833316365	0.3769242830884167
cage_09	18	F	TG	0.011784344644727806	0.03217814974008955	0.7259349967021872	0.964887454969318	0.0024949397481787076	0.3015872086816379
cage_09	19	F	TG	0.015355295905509566	0.031772934310169164	0.8895253023609138	1.1141122592369421	0.004239465346346027	0.6168476376388231
cage_09	20	F	TG	0.011696824554243654	0.026856296069747054	0.7429472465499496	0.9138837137605001	0.002243359555865925	0.3172471996526642
cage_09	21	F	TG	0.009958909451861753	0.020292965201160036	0.701882868071133	0.8827229747977422	0.001677426022946158	0.30542510307886306
cage_09	22	F	TG	0.007271565769398666	0.011648605699643462	0.32876224766228784	0.8495473853351477	0.00031974779364274267	0.006173545280058183
cage_10	7	F	WT	0.006988508187239294	0.031075519289043358	0.11986562241394362	0.9448096404194265	2.076234102377893e-06	0.0
cage_10	8	F	WT	0.008398501446911512	0.032462440637346025	0.12853864794112638	0.5799632094768038	3.1721995754670588e-06	0.0
cage_10	9	F	WT	0.00943002265919375	0.03237372476201399	0.1709385582290098	0.6721613383317558	1.045565823438856e-05	0.0
cage_10	10	F	WT	0.009587285485226714	0.035404151917170314	0.14808881088547501	0.6081386973788617	2.38954458222074e-05	0.0
cage_10	11	F	WT	0.010119040710821635	0.03274426681927713	0.14864330426092895	0.7658620260188359	9.40409769000202e-06	0.0
cage_10	12	F	WT	0.0071123047653508095	0.03486691393871606	0.1151729417040495	0.7609970676640373	1.0380335492443115e-06	0.0
cage_10	13	F	WT	0.007212142019019475	0.0320143028272779	0.1456895338873647	0.6158757509643105	1.1391146843534074e-05	0.0
cage_10	14	F	WT	0.008125053785048193	0.030777178942162663	0.13286912136084536	0.6391708779815598	3.014019881903194e-05	0.0
cage_10	15	F	WT	0.007886612049762638	0.025985750669288037	0.1541046672544614	0.5046491937639022	7.894492810252855e-05	0.014076182864088824
cage_10	16	F	WT	0.005437163875473205	0.026595200129708833	0.13936200761243125	0.48257268550234783	6.308761661528401e-06	0.0
cage_10	17	F	WT	0.009027499003302701	0.024476856095965782	0.14283727516294126	0.4774723044041763	4.071016950282016e-05	0.0
cage_10	18	F	WT	0.005564400008925112	0.025993586734014962	0.13265739227091336	0.584864346764355	3.561746823891353e-05	0.0
cage_10	19	F	WT	0.006381146630231879	0.023710331849676223	0.15142704595316303	0.46812371190029595	3.234079095951405e-05	0.0
cage_10	20	F	WT	0.006993596320553468	0.022762677295140137	0.15020608532176655	0.5068976353353613	2.709967817427124e-05	0.0
cage_10	21	F	WT	0.0073114091536691	0.02137239075155652	0.185311031575305	0.4642931701054572	9.83887295349036e-05	0.02652493723196789
cage_10	22	F	WT	0.006686802868433567	0.02369496549992144	0.16944635065917754	0.3901775998917511	4.586707573771842e-05	0.0
cage_10	23	F	WT	0.006340450001752793	0.02550496524117723	0.22885388366709966	0.3858424509597168	0.00015138319231552247	0.0155790991966403
cage_10	24	F	WT	0.007865749070958238	0.024834245882041243	0.17408472894666396	0.3831810056191913	5.529957007749332e-05	0.0
cage_11	7	M	WT	0.00671606065204209	0.031506785553033226	0.07669447395132782	0.6541836476341596	6.25651246594384e-06	0.0
cage_11	8	M	WT	0.008238485140449338	0.0307500682318577	0.08175488259925091	0.5338275804239329	3.126064563495932e-05	0.0
cage_11	9	M	WT	0.007769044172936886	0.034335231251689066	0.12735498719850016	0.6324211404795604	5.346542661127816e-05	0.0
cage_11	10	M	WT	0.0064611963180401894	0.03148257772334102	0.11951077228669989	0.6845939624904647	1.147039443608071e-05	0.0
cage_11	11	M	WT	0.008972354125495621	0.031221103574953106	0.15689331082065702	0.6883884363245539	6.763871830158212e-05	0.0
cage_11	12	M	WT	0.006785814145475254	0.03266372282316711	0.10769803403249971	0.5910214584675285	7.356099228040584e-06	0.0
cage_11	13	M	WT	0.008234855996680375	0.025659730888887004	0.09815248299554773	0.7571189695347521	4.161485850574041e-06	0.0
cage_11	14	M	WT	0.012466768257706227	0.027099577022291352	0.1264639973214478	0.6099082216439392	9.634128843291982e-05	0.020571923464954688
cage_11	15	M	WT	0.013203893734808868	0.028016091015252893	0.13541998619691595	0.6518289806450663	5.1773044733797545e-06	0.0
cage_11	16	M	WT	0.009912817460820412	0.028278145739724852	0.12563011625347226	0.7039843552239766	7.337398890534909e-06	0.0
cage_11	17	M	WT	0.011874471221308178	0.026538845321664235	0.1491064652540168	0.6784323934799066	6.303695616749606e-06	0.0
cage_11	18	M	WT	0.01228703681410992	0.024284154977027326	0.1547022764716149	0.6780750496639836	6.983519412089591e-05	0.01904597988596312
cage_11	19	M	WT	0.013185133972705654	0.026911757812624455	0.13355899237603044	0.8451086250661876	0.00010008430835450492	0.02659701163741086
cage_11	20	M	WT	0.01176966823496991	0.026076278397075842	0.1794328103160973	0.824447601677992	0.00015647995051333124	0.05356053294570814
cage_11	21	M	WT	0.015730311442786218	0.02446157933324819	0.19040205786415015	0.5323957772610487	0.00023684445162566563	0.04039263362266909
cage_11	22	M	WT	0.016275092749296748	0.02694408427272069	0.1848996034933792	0.6136075279366482	0.0001290515645992128	0.022562074780508482
cage_11	23	M	WT	0.016350436800543707	0.024693229830313444	0.15229789217624168	0.6463709198789129	0.00011590057669713784	0.0
cage_11	24	M	WT	0.017722826712999813	0.028436353704599796	0.20158510823218248	0.700683508934806	0.0003132537957286676	0.11100988144317836
cage_12	7	M	TG	0.007190221923890531	0.025203302007021026	0.09721163220482941	0.5864834954802974	1.7714149527836842e-05	0.0
cage_12	8	M	TG	0.01093324076018643	0.028602329380134742	0.14865255068951008	0.5836671384581447	4.186990794554879e-05	0.0
cage_12	9	M	TG	0.010523484606903015	0.025673290579221086	0.1459188176236594	0.595870820307465	3.764656954093242e-05	0.0
cage_12	10	M	TG	0.011641696336215174	0.021418990295363587	0.14447680374098573	0.3609364861210648	0.00014465928543665638	0.02983229445021332
cage_12	11	M	TG	0.012898993748336586	0.02216872936535746	0.24475929804088872	0.526822762296878	0.00017153699280904056	0.040998030666372004
cage_12	12	M	TG	0.010134015443404762	0.020430017971517663	0.1696925533134899	0.4472418864029712	3.8704197122166274e-05	0.0
cage_12	13	M	TG	0.011870473031411791	0.01658051505845873	0.19498090365770387	0.5406465153622243	0.00010192484335154844	0.0
cage_12	14	M	TG	0.013724367418069065	0.019578752150863642	0.2354503084217419	0.5360232382478463	0.0001602725335829693	0.04860850202906796
cage_12	15	M	TG	0.010934917236782577	0.01837270137083093	0.2662538431304607	0.7370473584526287	0.00016260544247011046	0.01953318233899182
cage_12	16	M	TG	0.011732854620427634	0.022293602375409578	0.36686807201275135	0.7284050741195883	0.0004734636465747785	0.06766894160347549
cage_12	17	M	TG	0.009298364021219837	0.02053081351862617	0.33085141923174904	0.9330373475668853	0.0004390135919724613	0.09870312833276662
cage_12	18	M	TG	0.013338111988163615	0.022025506458677978	0.6087217578037281	0.8832236325728816	0.002188795778948697	0.4606096693665814
cage_12	19	M	TG	0.014916518061855101	0.02422775185186341	0.7479183136366193	0.9079275402187431	0.0033553122354167977	0.7093170532857921
cage_12	20	M	TG	0.015332037809744056	0.024860483638213304	0.9078920404603933	0.9457894679093298	0.004500575616882296	0.8215807949668504
cage_12	21	M	TG	0.013519129642022289	0.022083006162158147	0.8238947925864174	1.0708176784252132	0.0035971747727279783	0.6980453353420564
cage_12	22	M	TG	0.010173718530133926	0.017135910956116794	0.6335007417568479	1.1193512569598527	0.0014736257349755085	0.3630317394977867
cage_12	23	M	TG	0.0038385104778155947	0.008707470343332335	0.3937305190830174	0.7751950879298215	0.0003737734223482391	0.09381546264836813
cage_12	24	M	TG	0.004299167092705126	0.007202517713637719	0.2687685307547439	0.793954313329639	5.266005813746256e-06	0.0
cage_13	7	F	TG	0.005331029682707212	0.025907822260819283	0.15060855315406413	0.8564607444127553	5.3085294690045706e-05	0.027764864101383808
cage_13	8	F	TG	0.008091148866819003	0.027518408400757092	0.11389167737747471	0.6625535004313342	5.4068052234625484e-05	0.007938008164875764
cage_13	9	F	TG	0.005566907973424857	0.02927156702967221	0.113361802931087	0.656154516301146	3.3098886447235e-05	0.0
cage_13	10	F	TG	0.008235186755864954	0.030733759530084954	0.12456214439119033	0.715698902761808	5.251722123663479e-06	0.0
cage_13	11	F	TG	0.0072974805565695945	0.029637653151574524	0.11152653007682457	0.5625918210606908	1.0569930661254863e-06	0.0
cage_13	12	F	TG	0.008009526165726042	0.03355378098901844	0.1015643505475045	0.680468093367142	1.4579772974335022e-05	0.0
cage_13	13	F	TG	0.009608402765317995	0.03047175538825092	0.1057101787565533	0.9269614598708633	5.199519399818354e-06	0.0
cage_13	14	F	TG	0.010421301921396032	0.025809634115067544	0.13898912953297052	0.5809625610402042	2.4006924324117186e-05	0.0
cage_13	15	F	TG	0.008508097066249753	0.031203856327779545	0.09126342334173113	0.60162156267666	1.148964506807644e-05	0.0
cage_13	16	F	TG	0.009835352679674407	0.025214362251457605	0.11784942103288178	0.4938765617270727	2.395535642086945e-05	0.0
cage_13	17	F	TG	0.01032140979943406	0.028801530072256536	0.20853078904126132	0.6059360334828722	0.00013857030899177555	0.0
cage_13	18	F	TG	0.009134461111849543	0.028182926269076203	0.345433819850094	0.5904555931326305	0.0005086614163599661	0.09906383359688764
cage_13	19	F	TG	0.011775654500333452	0.026274746811667467	0.5729555644038057	0.8667329805743361	0.0013267325261582573	0.35931854266396496
cage_13	20	F	TG	0.014923718851625445	0.02975692918922283	0.7940918859892125	1.0594886617826362	0.003611740864245093	0.6450994307555786
cage_13	21	F	TG	0.013880041054321815	0.027806705564843912	0.8772579924159576	0.9569668864384828	0.0044522289235298254	0.5896853012542098
cage_13	22	F	TG	0.01366830008524862	0.022165088212479898	0.8461922629372155	1.0536858524454247	0.0033179566290940737	0.5505983680102714
cage_13	23	F	TG	0.008798873187686074	0.01734765811441173	0.6311926716143862	0.9358136535410575	0.001763639724807636	0.3038929180416052
cage_13	24	F	TG	0.005143793519132633	0.00632370545112234	0.43490754090328027	0.5623442211164312	0.00031486585764852284	0.1331933971778508
cage_14	7	F	WT	0.006843842758216495	0.02403740336648676	0.09059711615272727	1.0133162676264085	2.1139861322509726e-06	0.0
cage_14	8	F	WT	0.006165835222957004	0.024399005825325577	0.06144948577775013	0.6240350611563976	0.0	0.0
cage_14	9	F	WT	0.006231463073431403	0.022883713751700962	0.07461824965389241	0.6076950347389282	0.0	0.0
cage_14	10	F	WT	0.007439814382435653	0.022547590252147986	0.0874041570547915	0.37919396780410647	3.161589973734186e-06	0.0
cage_14	11	F	WT	0.007722833783067978	0.020235129556648603	0.08473299593388668	0.5596296566961955	1.0242543428384136e-06	0.0
cage_14	12	F	WT	0.007753035268437482	0.020981200171805776	0.12069766957074647	0.2433630959500773	3.128128128128128e-06	0.0
cage_14	13	F	WT	0.008186885140590615	0.021298515849401057	0.13780014906303856	0.4564640090527511	6.279975065695631e-06	0.0
cage_14	14	F	WT	0.00861001092569086	0.017003547701668724	0.14738984426674318	0.5596761211463732	2.05761316872428e-06	0.0
cage_14	15	F	WT	0.007027001115600447	0.014323298765394028	0.10605422365132856	0.44898509099257666	1.0569930661254863e-06	0.0
cage_14	16	F	WT	0.006032768006702345	0.015743471750132798	0.1027946384426133	0.28157959244681224	0.0	0.0
cage_14	17	F	WT	0.006460549540006354	0.014762818581294575	0.10787082826805709	0.33593005934042736	4.2087542087542085e-06	0.0
cage_14	18	F	WT	0.006316405478965875	0.01502233295624976	0.12114908848422161	0.3141265797384278	0.0	0.0
cage_14	19	F	WT	0.006914407611343753	0.01411471296260094	0.1159943539379595	0.45369274198447646	3.114100647732935e-06	0.0
cage_14	20	F	WT	0.0076334127074431934	0.01345535347035917	0.14545954604273817	0.34470714278745423	6.224328509746977e-06	0.0
cage_14	21	F	WT	0.006989995519622337	0.01538496127310801	0.15206790500591683	0.32476892959747844	3.2255842326410955e-05	0.0
cage_14	22	F	WT	0.005792079572629106	0.014858682260308578	0.16314461504413305	0.3137463366781968	2.929831999712063e-05	0.0
cage_14	23	F	WT	0.00660054582238681	0.01704782164672027	0.12883586898710148	0.405524862753759	1.8813156141253245e-05	0.0
cage_14	24	F	WT	0.00613611680952789	0.015216006986874893	0.14120408446925822	0.3987952810061218	1.990605544527113e-05	0.0
cage_15	7	F	WT	0.005479603366016872	0.020036128185411273	0.09064398955394082	0.9281004005554865	0.0	0.0
cage_15	8	F	WT	0.007584432928427844	0.022734279693903115	0.0883065506860341	0.7222279964752696	0.0	0.0
cage_15	9	F	WT	0.008226703652239473	0.025317117354151368	0.1233016596563222	0.5303814345977391	2.0901368940584625e-06	0.0
cage_15	10	F	WT	0.008729162138308095	0.025832107741888648	0.1097062635025742	0.47248629391309177	0.0	0.0
cage_15	11	F	WT	0.01019147904938098	0.0213952160283384	0.1048897658564287	0.5084323004330655	1.1522002366546464e-05	0.0
cage_15	12	F	WT	0.0061361754376157845	0.018630778109172175	0.1000725245513177	0.4787571615260077	0.0	0.0
cage_15	13	F	WT	0.008545335648930098	0.02280418290105269	0.10057033471359687	0.2898376320710759	0.0	0.0
cage_15	14	F	WT	0.007994104560855185	0.021716037803220813	0.10806590855820898	0.45340031586382207	7.280641471817943e-06	0.0
cage_15	15	F	WT	0.0072306013602911785	0.015339613604591958	0.13459788019902502	0.2685035187219077	3.1518046223928574e-06	0.0
cage_15	16	F	WT	0.006492307580717806	0.019569953509994166	0.09633386895805608	0.444157693426886	1.0667349377026798e-06	0.0
cage_15	17	F	WT	0.0077335938097636	0.019774679448465098	0.11094108097847313	0.30966676705181406	0.0	0.0
cage_15	18	F	WT	0.006618230538770972	0.01847379055858673	0.1120347138984873	0.26583098589360815	6.294997474432957e-06	0.0
cage_15	19	F	WT	0.007372603149481978	0.01898372982072979	0.1145511627335569	0.22524822059755004	1.2650721211841403e-05	0.0
cage_15	20	F	WT	0.0063080806566597585	0.017761753494003177	0.1305537447771503	0.24800560783959552	3.105040686740033e-06	0.0
cage_15	21	F	WT	0.008897410304800988	0.01716138404641799	0.1381122096162533	0.21866117337357918	1.049414383044206e-05	0.0
cage_15	22	F	WT	0.007843562299283966	0.018664156672280247	0.1757732267909298	0.24865600809983507	3.2627250626532444e-05	0.02982290980161902
cage_15	23	F	WT	0.00763110481440588	0.016183449588474993	0.14296226177245727	0.3499785843094494	1.2498783556979547e-05	0.0
cage_15	24	F	WT	0.008753974988893808	0.02077687330787708	0.14328589219399765	0.26320156161277014	1.7666074263250687e-05	0.0
cage_16	7	M	WT	0.008268308487466505	0.03794827724793796	0.1602227659269804	1.0381776251332624	0.00012120073862766953	0.0
cage_16	8	M	WT	0.008738258075437667	0.03603665728832602	0.18711756377248173	0.6294735084699309	0.00017806147357531032	0.024887273179823727
cage_16	9	M	WT	0.007884509959592856	0.035755805787101004	0.174140214293269	0.8566298088284753	0.0001294544397323199	0.02194399640828787
cage_16	10	M	WT	0.009738743251621529	0.037117982288727216	0.158624853799806	0.754893372404492	0.00012189588014699872	0.0
cage_16	11	M	WT	0.009730133480737549	0.034019927654887795	0.20239988984583937	0.5223759560278173	7.404908493656606e-05	0.0
cage_16	12	M	WT	0.01093317190678554	0.03717421767858626	0.19166869842771397	0.673943250922459	0.00010845409048615091	0.0
cage_16	13	M	WT	0.009392630007549519	0.03138887420915631	0.21911350552595557	0.6568447052228545	0.00011443749299538891	0.009408324606595877
cage_16	14	M	WT	0.012898042641589351	0.030892253884679338	0.22948695880109157	0.714201187946676	0.0002927755687903899	0.06567479075291563
cage_16	15	M	WT	0.009743455485195935	0.023795579351017792	0.23254998385421283	0.6105919096653868	0.00014419486663504554	0.03650797154319952
cage_16	16	M	WT	0.007999604418806448	0.02526942584666661	0.19452473178645815	0.6409996849786126	0.00010069763171028104	0.0
cage_16	17	M	WT	0.00862601401968393	0.02266973703379141	0.18948884805741548	0.6962215644222127	6.475881354844243e-05	0.0
cage_16	18	M	WT	0.009503342493937118	0.026364473118547626	0.31327197365455944	0.8326767182622677	0.00018423980655564543	0.03774854247496445
cage_16	19	M	WT	0.01117360075979928	0.022711450137421683	0.286604736062315	0.6613592754693801	0.0002518023474725193	0.024065343982258264
cage_16	20	M	WT	0.01157853815949233	0.02429501450989339	0.31033211670551764	0.7015107489205352	0.0004894223186943347	0.14454949341338144
cage_16	21	M	WT	0.011866461713878734	0.021615432010518163	0.3490049811600681	0.769678848232503	0.0003733912914941793	0.09036064042432457
cage_16	22	M	WT	0.01008160969161198	0.024676676015031856	0.33560236088800327	0.8041272444830951	0.0005882025622557268	0.10400636220306056
cage_16	23	M	WT	0.0096275819561701	0.022278568216008172	0.2998391797144251	0.8160722750364615	0.0003034673803368832	0.0729211734279712
cage_16	24	M	WT	0.009194996885174755	0.02175903428611912	0.35581136018767384	0.7007712610347099	0.00033403392931500697	0.09314502161306536
cage_17	7	M	TG	0.010857102168327665	0.03355364584478749	0.15247176054013684	0.7460477798441517	7.599594348426616e-05	0.0
cage_17	8	M	TG	0.011274750374296068	0.03728286189588692	0.14827979182362622	0.9373272978060817	1.7845174011666255e-05	0.0
cage_17	9	M	TG	0.01175847201424904	0.03888196713358895	0.17236636461750793	0.6797837848248209	5.619840860285226e-05	0.0
cage_17	10	M	TG	0.011175822241998687	0.03108771234492242	0.14653688467961198	0.7844107406955876	8.403783553612319e-06	0.0
cage_17	11	M	TG	0.01867755021799777	0.03756198603166563	0.16539516593513884	0.7470953395949619	9.424800409562535e-05	0.0
cage_17	12	M	TG	0.01864384936920629	0.03358866485613703	0.2215474928690919	0.6728281560964559	0.00021586870491851023	0.06584440014787764
cage_17	13	M	TG	0.022085411375332084	0.030550952129224408	0.2391572575554156	0.6813946955355508	0.0001503402686571485	0.026251064612371762
cage_17	14	M	TG	0.024985623753093475	0.038209944151717225	0.22484974987448364	0.7259577980046318	0.00015755361284586734	0.009408324606595877
cage_17	15	M	TG	0.02205385758139418	0.03051492703471047	0.4365841691862868	0.7317324869506691	0.0007795783062458227	0.2665810410615708
cage_17	16	M	TG	0.017260631798453514	0.027745495473192522	0.6004073811967777	0.9862976989520599	0.00188177972124668	0.4426227144261938
cage_17	17	M	TG	0.02023679449885777	0.029200221246403625	0.717058758214194	0.9940556563015436	0.0035352114462952815	0.8895930245644591
cage_17	18	M	TG	0.01835047564845688	0.031073467041290704	0.8395276816508102	1.118965326190547	0.004354363340826732	1.131971884207262
cage_17	19	M	TG	0.021487828009123796	0.027363050552810304	0.9520582094883735	1.1816303754584594	0.005954355455715186	0.8260373204049591
cage_17	20	M	TG	0.014672787713725566	0.020209239824574707	0.9764061447202351	1.1546317663460688	0.00462550620494036	1.0512830372773498
cage_17	21	M	TG	0.011480838874605248	0.015203194452498865	0.9037379751447252	1.2295889813114578	0.003065396061485653	0.6456814141196079
cage_17	22	M	TG	0.0073323930913964585	0.01156315987980175	0.8034425416721331	0.9580702914622474	0.002439402693072205	0.4976164883632019
cage_17	23	M	TG	0.005972898532624095	0.00961312537449892	0.5068204933439742	0.8081289296400831	0.001021378281699953	0.16281858988967102
cage_17	24	M	TG	0.001807542096572796	0.0038753768726305688	0.167562288265776	0.5649114989565678	3.104873682850763e-06	0.0
cage_18	7	F	TG	0.008664782205244859	0.028621414320795648	0.12107774245790325	0.766021520246034	9.379708557585983e-06	0.0
cage_18	8	F	TG	0.00939902768335328	0.026396329495106945	0.10523807250121871	0.5928083305236588	1.868506200609464e-05	0.0
cage_18	9	F	TG	0.008445827110073	0.027543457173039583	0.12720998526814248	0.7029780525702025	0.0	0.0
cage_18	10	F	TG	0.0075216657923519665	0.01879062077167632	0.14663690822958	0.5686617702542826	7.3089572802875565e-06	0.0
cage_18	11	F	TG	0.014987069696579125	0.03735405561890056	0.251384069911961	0.7097672595787959	0.00036418637950021604	0.07046148151428593
cage_18	12	F	TG	0.009769177530005347	0.027291410320759775	0.11944022838692737	0.40284257852949074	9.245847498357519e-06	0.0
cage_18	13	F	TG	0.011593474166573971	0.022170619453525435	0.13289798032454628	0.5797377517408867	6.219141334472968e-06	0.0
cage_18	14	F	TG	0.01103350953562988	0.023593373601902466	0.13705944143168708	0.4162845420175811	1.5603570280766267e-05	0.0
cage_18	15	F	TG	0.011650350491830821	0.017638623313966876	0.15402221370155164	0.39390045503482146	5.190167746221558e-06	0.0
cage_18	16	F	TG	0.012064291571603096	0.01733386211798827	0.1854324400754637	0.6105536789279574	0.0001382817782088876	0.03840654534694999
cage_18	17	F	TG	0.011922492287427514	0.018734501706277374	0.25108588303868734	0.43423845763402985	0.00013869283489489385	0.007938008164875764
cage_18	18	F	TG	0.01422501607523616	0.023181402460800107	0.43275806909110864	0.6996894497594089	0.0007746603340679457	0.17884374358971422
cage_18	19	F	TG	0.01738053379178252	0.02508332101781755	0.5700991388611603	0.8908872242417732	0.0017287823871225613	0.35434612805940285
cage_18	20	F	TG	0.01635523403768638	0.025410325962178206	0.7131117351002872	0.9489489264081348	0.003166687357623134	0.6748690143414543
cage_18	21	F	TG	0.016697695104348476	0.0227706109654303	0.8195031120742277	0.8505509395675297	0.002861396466508825	0.4124770157211451
cage_18	22	F	TG	0.008614928147130484	0.01261720555547394	0.7422523782840179	0.8360718009787439	0.0015982735002652597	0.4718974117288544
cage_18	23	F	TG	0.005366906921465398	0.006063343203115611	0.43666445995123176	0.6843773250847561	0.0002635010009681473	0.04836543628872636
cage_18	24	F	TG	0.001884337835735353	0.0015613854622540768	0.14639161754147	0.2528274884382653	0.0	0.0
cage_19	7	F	WT	0.006826481467332289	0.026312611638534017	0.08776841987817262	0.801317243319788	0.0	0.0
cage_19	8	F	WT	0.007338618030383646	0.02561498286833902	0.12433810025677079	0.6243429837757788	2.1240855714179925e-06	0.0
cage_19	9	F	WT	0.008040487360803076	0.03382756643810518	0.12658302343311637	0.711716454624142	2.0950266153697976e-06	0.0
cage_19	10	F	WT	0.011997786576124802	0.03772979580033347	0.13007452510153888	0.5076123765965956	3.1282556506771753e-06	0.0
cage_19	11	F	WT	0.009787851916267251	0.03617361110757624	0.11582714362028672	0.7049128042675527	8.339110040587781e-06	0.0
cage_19	12	F	WT	0.009090887015399186	0.03589200627226835	0.12134362093070421	0.9272888538926758	7.294797618508379e-06	0.0
cage_19	13	F	WT	0.010082636618135212	0.03357668896111592	0.16548485750880731	0.6288158612665352	2.9095589877598432e-05	0.0
cage_19	14	F	WT	0.00986922648891261	0.041042440590243465	0.12338229634038288	0.8551316879068084	1.249525973489092e-05	0.0
cage_19	15	F	WT	0.01188576896088952	0.03068226186555522	0.13816637820342195	0.836029482069436	2.9370110324086792e-05	0.0
cage_19	16	F	WT	0.010768145990798233	0.03295508911768523	0.15215304346283112	0.6515852946498404	1.1488977733773673e-05	0.0
cage_19	17	F	WT	0.011416356816989534	0.0348714316932222	0.1106111145132554	0.684852900494558	6.2477993043167375e-06	0.0
cage_19	18	F	WT	0.013627398816252119	0.036914613957222175	0.11671885520023854	0.6850514792079974	1.6651799056083375e-05	0.0
cage_19	19	F	WT	0.014060096437639827	0.03290044424944174	0.11895346930948428	0.7818626701812627	1.9826348063559633e-05	0.0
cage_19	20	F	WT	0.012047847658572051	0.03673684828324119	0.1642157428361304	0.7733525019300893	1.9790335738076136e-05	0.0
cage_19	21	F	WT	0.016014972203336805	0.03770915770194278	0.14698540413695674	0.7805951006934763	5.192723388667801e-05	0.00853819829479847
cage_19	22	F	WT	0.012188176063833935	0.037181039395790975	0.13231973557524906	0.8031687488468455	3.166392692386576e-06	0.0
cage_19	23	F	WT	0.015060337917824393	0.038487305049918055	0.14480850777973853	0.8771113376575643	1.142376142376142e-05	0.0
cage_19	24	F	WT	0.016218287682773783	0.03528355221930108	0.17912078809579104	0.6398444186475503	5.219452628408224e-05	0.0
cage_20	7	F	TG	0.005408393046116112	0.02417666519630974	0.13146155270565577	0.5499116031721408	2.9275007384106273e-05	0.0
cage_20	8	F	TG	0.005068562917790065	0.025348026687195997	0.09459115613375797	0.5484705904925262	1.7811541249041255e-05	0.0
cage_20	9	F	TG	0.006101214015846859	0.0322375617934324	0.10932139611015464	0.5312989905582451	6.977622079089257e-05	0.0
cage_20	10	F	TG	0.00563004367339139	0.029083787177367704	0.1315403624241453	0.5324316755928915	1.664288272657435e-05	0.0
cage_20	11	F	TG	0.005494829904500387	0.03293015226531466	0.1504791060486044	0.38583642291681347	0.00012649575451042686	0.01953318233899182
cage_20	12	F	TG	0.006025098322012464	0.03505324968115997	0.1485191812843706	0.4992574677220804	0.00013133048778105592	0.06570273259538227
cage_20	13	F	TG	0.005960464225084318	0.0335193397579218	0.12110098810370887	0.601258983026934	2.0012664130421546e-05	0.0
cage_20	14	F	TG	0.006128236051070858	0.03221355585431231	0.1591525415006893	0.5042580105677668	4.907063880820581e-05	0.0
cage_20	15	F	TG	0.005429725202463127	0.031054365796025385	0.16915345017252306	0.6622807152905903	9.743744358893404e-05	0.0
cage_20	16	F	TG	0.0077769155237218885	0.032267536074053596	0.2752110738488828	0.48369880126953746	0.00029674103456881325	0.04791245901895525
cage_20	17	F	TG	0.00896101930023578	0.03235255911452687	0.4758080118510299	0.7515755591794279	0.000923823895622458	0.24001716766244366
cage_20	18	F	TG	0.011040354996943717	0.033077269474834546	0.7775397631258273	0.9903051409759394	0.002988942153960403	0.7044634574690946
cage_20	19	F	TG	0.01485520087507844	0.037562115656078546	1.0903779707918884	1.174702207475699	0.00703268020920185	1.2585464357706788
cage_20	20	F	TG	0.015432535215760691	0.028889157194022234	1.0750618370389207	1.0899156066121516	0.007479726504939381	0.9127589948839476
cage_20	21	F	TG	0.01289382588040582	0.026388176984101976	0.9299172050925769	1.067928305130342	0.004614795646466872	0.8873530214476197
cage_20	22	F	TG	0.010889417846552242	0.024183340715547074	0.8756400719574081	1.0249732810642471	0.003501190400334507	0.8495081194051904
cage_20	23	F	TG	0.004999817253601445	0.011042005072282016	0.39266114275673397	0.807518500256095	0.0003700727951609835	0.10469170984107136
cage_22	7	M	TG	0.008239035729647001	0.03686650379223384	0.13745788971422424	0.9821315356960773	6.589635287825648e-05	0.0
cage_22	8	M	TG	0.008562220029856918	0.036678673676140625	0.14280112796364347	0.7725517462099762	5.7114471169241016e-05	0.010165752117140318
cage_22	9	M	TG	0.010395120246089141	0.03571465440946668	0.1624384457644233	0.9912062240257707	4.499346165790796e-05	0.0
cage_22	10	M	TG	0.01252660523265964	0.0367021187653361	0.163989714507321	0.7316197587690835	7.376589197386651e-05	0.0
cage_22	11	M	TG	0.010363724323818725	0.03858578108536247	0.17379791849348583	0.7896380409859916	2.4002079216012163e-05	0.0
cage_22	12	M	TG	0.010146387644564353	0.039889689618152736	0.23666445506481262	0.8763585481509332	6.474180730449212e-05	0.0
cage_22	13	M	TG	0.011839190385390651	0.03912226236893185	0.1937098826480003	0.7913425636411285	5.97843522111057e-05	0.0
cage_22	14	M	TG	0.013486105770815411	0.033808928356368076	0.22306938401955628	0.7119708688196941	0.00013528027526842288	0.0
cage_22	15	M	TG	0.012997290882866037	0.03120466801364744	0.23617382699533823	0.785573758851559	0.00016184849856204993	0.03512331651036398
cage_22	16	M	TG	0.013403847315799952	0.034977536182953434	0.3734750908611583	0.8480922937386612	0.0005392064958776039	0.0601569745936836
cage_22	17	M	TG	0.016645243521531062	0.035563354864072354	0.6463878073993283	0.989208241874941	0.002814344548364028	0.4170759662621198
cage_22	18	M	TG	0.013845010053931872	0.031188886632486496	0.8420555977792423	1.0016017095128484	0.0036263653850192212	0.6002600386850333
cage_22	19	M	TG	0.0125716602026317	0.023922465422120398	0.8980965554882692	0.9934863579538658	0.002959166127460541	0.6383655124404062
cage_22	20	M	TG	0.011742004568269326	0.02075398186782196	0.9566418098232026	1.0773365560149357	0.0045424392730826135	0.7462029110178604
cage_22	21	M	TG	0.01075437836964422	0.015283387305297266	0.8512483071591578	0.9599652331743348	0.003209810735113437	0.5614826117811762
cage_22	22	M	TG	0.004572807322085432	0.006726871296914845	0.5858648319333686	0.6829983487294725	0.0009754486261499953	0.14368368252408478
cage_22	23	M	TG	0.004510706308187428	0.008653038424430133	0.5368820648549194	0.8269240885557875	0.0008042716675321416	0.27381279409986736
cage_22	24	M	TG	0.0014326945771572222	0.0036934266182018258	0.1903485347568938	0.5167252315201265	6.256256256256256e-06	0.0
cage_23	7	F	WT	0.008479250126013324	0.02844985237560284	0.11690811695603677	0.5560740219222584	0.0	0.0
cage_23	8	F	WT	0.007501190313476988	0.030592865614633622	0.12655761066360408	0.4310638321580599	0.0	0.0
cage_23	9	F	WT	0.00673087684492558	0.036028967103371834	0.09930723116678739	0.5133570138954361	4.2585569820758e-05	0.0
cage_23	10	F	WT	0.007749051074544368	0.03307188016262943	0.08957385620470405	0.4282942206853525	2.066798941798942e-06	0.0
cage_23	11	F	WT	0.006676359930233449	0.03094918373924391	0.12182985580070685	0.3808740113377569	1.5702529541055814e-05	0.0
cage_23	12	F	WT	0.005904111987021472	0.038855463403470125	0.10444731025784866	0.46386952001014553	1.4659989384254093e-05	0.0
cage_23	13	F	WT	0.007947407902749186	0.030890161439223095	0.11769661070022626	0.3148638575281019	1.3505513874187255e-05	0.0
cage_23	14	F	WT	0.005359759025495015	0.02666669277725644	0.13035135101111478	0.5196211783008378	5.333674688513399e-06	0.0
cage_23	15	F	WT	0.006273705558144971	0.028064875683184082	0.10203057957675742	0.4756896739594946	1.0474275180157531e-06	0.0
cage_23	16	F	WT	0.006141808306952469	0.028836096552732917	0.09821512034809066	0.4076732741928964	4.115307627475769e-06	0.0
cage_23	17	F	WT	0.007198200898483092	0.030244976374125012	0.13519703904561917	0.3474106296823458	4.156851772229201e-06	0.0
cage_23	18	F	WT	0.007062138638121319	0.02815068001331773	0.12279564000096828	0.41312747805194	3.1711108343596207e-06	0.0
cage_23	19	F	WT	0.006712006526992046	0.029650792208612015	0.0913123176172894	0.4171346032236558	1.2485690691104401e-05	0.0
cage_23	20	F	WT	0.007526014335646175	0.029803832833862655	0.1309433984102318	0.4123728147772029	6.275426194725192e-06	0.0
cage_23	21	F	WT	0.006790176740636728	0.02837484844147504	0.11083316961588688	0.43582347199720967	2.8184205793480452e-05	0.0
cage_23	22	F	WT	0.006095238206861211	0.028851907497874484	0.11656274250544499	0.4258736221904497	1.4707611404690466e-05	0.0
cage_23	23	F	WT	0.007132790860202218	0.026518873394397607	0.1352634823855442	0.3294664422577632	5.200563797313408e-05	0.0
cage_24	7	M	TG	0.010586635462405528	0.028781703748352806	0.1461263294227095	0.6328059916769991	4.1803166803166785e-06	0.0
cage_24	8	M	TG	0.014048986663001558	0.03320867999101349	0.20193658831486724	0.7211005850951605	9.05196808242164e-05	0.030301696436443013
cage_24	9	M	TG	0.015784034392564646	0.03889504096026849	0.18295059440698744	0.8457388551654752	6.457783924806249e-05	0.0
cage_24	10	M	TG	0.015000948272629345	0.036972442020085	0.2094804888817538	0.7427894458858472	0.0002531476660199426	0.04993670781255172
cage_24	11	M	TG	0.015310414355070833	0.035502456489976034	0.15256898723328274	0.7484174265435793	5.232812553603712e-05	0.0
cage_24	12	M	TG	0.01976953547565914	0.03229249071781907	0.2082208246579382	0.7098994943849425	0.00014154027263381104	0.0
cage_24	13	M	TG	0.016490467706106817	0.032778566780642095	0.19604411437623975	0.7230237040607497	7.375751894738384e-05	0.02315613519857177
cage_24	14	M	TG	0.021819343021913032	0.025837353414087112	0.25353481324185595	0.5000714125086778	0.000300335237884488	0.045322285913940295
cage_24	15	M	TG	0.01840932757775379	0.02840249028694355	0.30251998692030374	0.850418359823401	0.000441345669041979	0.08668599933294609
cage_24	16	M	TG	0.01694934717069285	0.025470429623665792	0.3447327520266872	0.6924759901036391	0.0003067095033232169	0.05811539132599805
cage_24	17	M	TG	0.021667973961581072	0.031294555561404876	0.47092663454855793	0.8994426090547835	0.0009393587006935376	0.21554014518444398
cage_24	18	M	TG	0.016667789996869888	0.025776866450967106	0.5387416249067252	0.9103845587411488	0.0019086526572319176	0.4650176082163615
cage_24	19	M	TG	0.013238135089550391	0.027842108730053956	0.7074689250311549	0.9221354992048179	0.002502659331508883	0.4871960725166543
cage_24	20	M	TG	0.016976725299031818	0.024538683592396814	0.8901806967566135	0.9389257417243309	0.0042287137165976495	0.6211965396602758
cage_24	21	M	TG	0.01434691001985486	0.021545561774266375	0.7414654656854246	0.8328322297166959	0.0030740264934040447	0.4617220306786385
cage_24	22	M	TG	0.010241478030737947	0.013869543654647407	0.5144507345090038	0.8497755998299776	0.0013255783429387284	0.25303054508255635
cage_24	23	M	TG	0.005502849495164235	0.00604862155479444	0.275964214379551	0.5589724195607051	0.0003589261687243878	0.09551907319463593
cage_25	7	M	WT	0.011570705276918019	0.02880961583797286	0.1523497320570753	0.7155037012091336	1.0315872550349672e-05	0.0
cage_25	8	M	WT	0.010117746585674004	0.02166137126615155	0.18767898880237982	0.7861532905911858	4.052339227848101e-05	0.0
cage_25	9	M	WT	0.010307489865634598	0.02834695152007285	0.15589773291109982	0.8955151622688889	5.005971633020316e-05	0.0
cage_25	10	M	WT	0.010566292986694108	0.025354031312593277	0.22537643177004665	0.9015316339088875	8.346340746773212e-05	0.0059530137670132065
cage_25	11	M	WT	0.01049538570724934	0.026018301416903287	0.24670347248528376	0.6270943292434163	0.00013545053201842675	0.006536785525546878
cage_25	12	M	WT	0.00956775900855389	0.02434835964018862	0.18470465859386584	0.7784337494521879	0.00011357719523306584	0.030107049212372432
cage_25	13	M	WT	0.010117103695278193	0.02446556433926233	0.20661495744896902	0.8730413048001571	6.776676862402035e-05	0.0517866234197997
cage_25	14	M	WT	0.015742578421086062	0.021825476040676795	0.21190578549635933	0.7620180358769727	3.748747327810717e-05	0.006803665753375861
cage_25	15	M	WT	0.011198476990699306	0.021235122262373177	0.2300504200328993	0.6822204380786593	0.0001459840887859436	0.03393315920687325
cage_25	16	M	WT	0.012071549661931752	0.02270865556227663	0.24260967108074213	0.6888875294867477	8.656077559532909e-05	0.00853819829479847
cage_25	17	M	WT	0.010073990742473978	0.019644536985792358	0.23201858007548593	0.6142618759516397	3.0090874571555877e-05	0.0
cage_25	18	M	WT	0.009001298610511096	0.021219143841779257	0.216230903146679	0.5918882789877827	5.42706643100618e-05	0.0
cage_25	19	M	WT	0.009490905447547831	0.022064419239259662	0.21270380349787446	0.5663061607490061	6.155077683620267e-06	0.0
cage_25	20	M	WT	0.011779903613938622	0.021851416730941216	0.22178496659496977	0.6891480450073637	0.00012294689517593292	0.050828928260306994
cage_25	21	M	WT	0.015911114727059868	0.022160396240569723	0.27737377381537476	0.6439746244985833	0.0002767324714360631	0.09651547900694146
cage_25	22	M	WT	0.014263173820179435	0.023193773646736797	0.27168398905255514	0.8066188342635713	0.00010418167455814148	0.006803665753375861
cage_25	23	M	WT	0.012033412914651811	0.024677893013782603	0.2948429064999374	0.7908649143670129	0.0003877893864582122	0.14385532154988254
cage_25	24	M	WT	0.012916875515480859	0.019798286021316485	0.29673204753682947	0.6769646958075876	0.000600004473009934	0.11238272354872593
cage_26	7	F	TG	0.009088245099356865	0.04101800250457386	0.12247264648138308	0.8113039234714267	2.8116293812734938e-05	0.0
cage_26	8	F	TG	0.007755874072691071	0.0432041259318418	0.1395617086727489	0.8747937896071531	2.930550396623836e-05	0.0
cage_26	9	F	TG	0.008353209631925283	0.04996094011061827	0.18058766906000936	0.7612259472047634	3.556317592932607e-05	0.0
cage_26	10	F	TG	0.011719945706342716	0.049193504289711754	0.11986895568920551	0.6176999894528862	5.9425651966328846e-05	0.0
cage_26	11	F	TG	0.010185087733390344	0.051851756776784184	0.16528996860240097	0.44494135347021774	2.2931311437165947e-05	0.0
cage_26	12	F	TG	0.008986246539783341	0.04182600071038752	0.1578148116885473	0.4276646091581566	5.205737108805231e-05	0.0
cage_26	13	F	TG	0.011829231150019229	0.05757582551232331	0.1626893244715477	0.46680866896496703	0.00019231010051200403	0.04424107056105805
cage_26	14	F	TG	0.01586482550929175	0.035987885081851176	0.13975047569869053	0.7119109180473202	5.5280312379181644e-05	0.0
cage_26	15	F	TG	0.013600990545785549	0.03967148350492948	0.20270215390987456	0.3686876709262167	0.0003290871418801537	0.0525574483658896
cage_26	16	F	TG	0.012380079212620318	0.0409090425707984	0.1901119200309589	0.36157209513190913	0.00017818650329351872	0.06137525196128834
cage_26	17	F	TG	0.011424134332595435	0.044268748872784744	0.23098808972130408	0.543402540758281	0.00023984762179574394	0.014741673918251624
cage_26	18	F	TG	0.011236198220830926	0.035423356191905564	0.2884304573919775	0.4543804885910664	0.0003483320369702594	0.07060272920259565
cage_26	19	F	TG	0.010339251639142337	0.042667744525672104	0.3395526209901784	0.5942710186397914	0.0004927533929406106	0.13344004398393602
cage_26	20	F	TG	0.015286405943056408	0.040262706787603145	0.4507328503651752	0.6478067743995192	0.0011048784115268368	0.2931281695870953
cage_26	21	F	TG	0.013700027082360218	0.030885084649647752	0.405461770304902	0.6253971539841539	0.0007363088449687362	0.2112616765436116
cage_26	22	F	TG	0.01294174349543113	0.027580793605613354	0.561564663240293	0.6880525649355775	0.0018655894306335468	0.4062295800805832
cage_26	23	F	TG	0.010758174004349403	0.02220073426235344	0.661133914657822	0.6934852104224022	0.002284438718489489	0.3015126459947002
cage_26	24	F	TG	0.006231596403465931	0.014731700203444756	0.5008408913643624	0.6130772066703176	0.0005353636979703796	0.09012017580088237
cage_27	7	F	WT	0.015855059444731756	0.030669010299870143	0.17377934806642664	0.5988684843100694	1.0380335492443115e-06	0.0
cage_27	8	F	WT	0.01466911609543626	0.029431749084606256	0.14557258049659821	0.618983430242802	5.2422406391819496e-06	0.0
cage_27	9	F	WT	0.012657489148709622	0.032497252186018386	0.15882306051409406	0.8526265088068369	1.0380335492443115e-06	0.0
cage_27	10	F	WT	0.011817633886998002	0.030151277140777345	0.1872673666135988	0.47909112499046963	1.981351772582877e-05	0.0
cage_27	11	F	WT	0.012038118046102822	0.03346596939147322	0.1334462585904572	0.450680458818635	8.35629666340455e-06	0.0
cage_27	12	F	WT	0.012183546614282094	0.03059427757292092	0.11694501255334688	0.42661492185701644	2.0001756810053374e-05	0.0
cage_27	13	F	WT	0.00989977131527419	0.031743929342533124	0.11812636807947356	0.34509358488831804	7.25721945593022e-06	0.0
cage_27	14	F	WT	0.014695249861729343	0.027093829889612335	0.11150072423712613	0.3029555869509964	1.8740276128842014e-05	0.0
cage_27	15	F	WT	0.012810644961009178	0.029319784679181855	0.11551915192289565	0.33746955546511337	8.281222134298866e-06	0.0
cage_27	16	F	WT	0.011432325122261047	0.026508949467167222	0.09824316263910533	0.41651466231329864	2.1143829014199383e-06	0.0
cage_27	17	F	WT	0.010141770155912375	0.028772583850870347	0.09947879794214202	0.3450932793123309	1.0380335492443115e-06	0.0
cage_27	18	F	WT	0.009796018412844503	0.023949602652628233	0.11710833236756775	0.3202433709321391	3.147043588220058e-06	0.0
cage_27	19	F	WT	0.00931578605504703	0.029081495177376397	0.101135639192385	0.4003241321838279	0.0	0.0
cage_27	20	F	WT	0.009997251505810054	0.0302785984641683	0.1317665863985064	0.27922003121692873	1.0427178390776386e-05	0.0
cage_27	21	F	WT	0.01403268439578855	0.026003954545842894	0.1037952257751801	0.18014399697716446	3.128128128128128e-06	0.0
cage_27	22	F	WT	0.011353792865407197	0.028648535626357215	0.13263379343766799	0.3722793158299359	3.5366572868860774e-05	0.0
cage_27	23	F	WT	0.01625259054218867	0.026425848487310312	0.1316391707166371	0.4634046814852187	1.256084990208575e-05	0.0
cage_27	24	F	WT	0.013585169902047632	0.022263251935185784	0.12409867613132468	0.3381567429518642	6.0110838657467114e-05	0.010165752117140318
cage_28	7	F	TG	0.014262703244777443	0.033645570501371	0.1823722937357885	0.5995328285171796	7.098560900602176e-05	0.029123610211864243
cage_28	8	F	TG	0.014461923764661233	0.038852447278658726	0.18239975774682887	0.8818740285387541	3.127061960159282e-05	0.0
cage_28	9	F	TG	0.014812372424131762	0.04419534560767641	0.14648528685640216	0.7444488011477475	4.180273788116925e-06	0.0
cage_28	10	F	TG	0.014676832632613412	0.036663550934129326	0.17047837364696664	0.3415237557563088	7.27264931328787e-05	0.0
cage_28	11	F	TG	0.01386464423097824	0.04040849019579852	0.1629484998094552	0.4655467984501917	5.90749309214069e-05	0.021084114728563492
cage_28	12	F	TG	0.015948907651940666	0.032918101270350796	0.1601663280099279	0.37734291978645146	2.8258226419899542e-05	0.0
cage_28	13	F	TG	0.017528499401678253	0.030529836187154335	0.1381893433091797	0.30612304452837574	3.4501633404188786e-05	0.0
cage_28	14	F	TG	0.023231866231359116	0.03178235920537029	0.12857407864435322	0.3252492446102709	0.00013174888422770242	0.03140010047838947
cage_28	15	F	TG	0.019636547948563392	0.02717167782902592	0.16506940486328897	0.2616986882005006	6.891137501740579e-05	0.02897448830049706
cage_28	16	F	TG	0.02160535922699239	0.027682257234183754	0.20019328084661683	0.3701837864213268	9.810644496915592e-05	0.0
cage_28	17	F	TG	0.01805225308012332	0.028436327947549096	0.22455584058677186	0.4304254230160006	0.00016146607651014758	0.0
cage_28	18	F	TG	0.018422338057584354	0.023235881769837475	0.22992103574754172	0.3451247610835354	0.0005327562480815716	0.1014839436369665
cage_28	19	F	TG	0.016411257997619715	0.029327191031484113	0.4249115449983793	0.5124357710467244	0.0009734865960782377	0.2907764177961435
cage_28	20	F	TG	0.01836253820762354	0.02688238818751501	0.6032668748141605	0.7025272357804215	0.0019819113579338087	0.4273566471387156
cage_28	21	F	TG	0.01847997543217021	0.02345620646289866	0.683691673408488	0.7174341827096314	0.002797031499137721	0.5827804189485851
cage_28	22	F	TG	0.014650334252199271	0.020084896235826297	0.6144066510797436	0.7370438256849762	0.0016354119155987364	0.3783744030168151
cage_28	23	F	TG	0.010637426438467178	0.013905577866388604	0.4140989828629005	0.7606765831590484	0.0008939079767997613	0.1725885454675686
cage_28	24	F	TG	0.004165206945760975	0.009852127270882227	0.25091487212982494	0.48795423653763415	6.259028900774831e-05	0.0
cage_29	7	M	WT	0.011439898575271232	0.036822039967469355	0.1485498014693987	0.8359306487518486	1.989224242587471e-05	0.0
cage_29	8	M	WT	0.010027010495066921	0.03600753900629427	0.15100012830177886	0.7453699751352829	6.541332381318364e-05	0.0
cage_29	9	M	WT	0.01117389469436307	0.03457860362607009	0.14450592143831914	0.93119484306712	4.284973418424852e-05	0.0
cage_29	10	M	WT	0.012956959435621302	0.03200313180527465	0.1761120126295476	0.7519821866091142	0.00010554009833959036	0.025973311569683844
cage_29	11	M	WT	0.0074129730108908045	0.03244837222121525	0.1578315688509989	0.591877280578289	6.131720604741425e-05	0.0
cage_29	12	M	WT	0.009434057898151028	0.033999615094415236	0.1353348642199526	0.7688591793733741	4.082356063210446e-05	0.0
cage_29	13	M	WT	0.007269475732667151	0.03167467674815109	0.11796941844232056	0.708193626780887	3.14524260048232e-05	0.0
cage_29	14	M	WT	0.00960740989368569	0.031159028163874444	0.15618917332070165	0.6830319426562693	0.00011685835633702171	0.01015026955668528
cage_29	15	M	WT	0.007663535295853484	0.03169627748264087	0.2568114743580582	0.7271451932612459	0.0002800200224500997	0.08546437310199774
cage_29	16	M	WT	0.006520463080557668	0.032064247438016065	0.11265237023706619	0.54897435558666	1.4608093295711036e-05	0.0
cage_29	17	M	WT	0.005771378799588274	0.028681499291482646	0.19319740625572837	0.7114211761788771	0.00012631980908122425	0.00724751865662313
cage_29	18	M	WT	0.006691564491318512	0.027918852609498255	0.16534738820755474	0.7033090125066678	9.597573370165251e-05	0.0
cage_29	19	M	WT	0.005826123408875621	0.026747387564372997	0.17094415104457994	0.6884269607302391	1.1427971752726656e-05	0.0
cage_29	20	M	WT	0.007532437395736516	0.025960021424272783	0.20770412900886528	0.5216786297120664	8.254828852621144e-05	0.02004152135859616
cage_29	21	M	WT	0.008190647953135224	0.027996986581566415	0.1712669129091681	0.49093560878860015	0.00017045192792722788	0.00812247599407429
cage_29	22	M	WT	0.009554581897660184	0.029402004544538	0.24916125787955465	0.46537007254860174	0.00035842965902897235	0.08337015958221196
cage_29	23	M	WT	0.007596699864140505	0.026309649706254472	0.22624606046210555	0.43648215059412526	0.000168953569739839	0.01904597988596312
cage_29	24	M	WT	0.005799624954451204	0.013171639207775082	0.17252945725276822	0.21425618444970007	3.7425317694375985e-06	0.0
cage_30	7	F	TG	0.014161812120997395	0.03488004762928506	0.14806545929252227	0.3933857530733297	4.133597883597884e-06	0.0
cage_30	8	F	TG	0.009157020382517318	0.031147356471283853	0.13245256011908024	0.5501278487132005	2.066798941798942e-06	0.0
cage_30	9	F	TG	0.01019255608848061	0.028125380786623595	0.15119875135310729	0.6279465373815241	4.895474562214602e-05	0.0
cage_30	10	F	TG	0.012149851843750214	0.035727225926713325	0.13391156212030295	0.6720519158890114	3.56337716058529e-05	0.0
cage_30	11	F	TG	0.00981876280243227	0.0381568523712957	0.1170552457842042	0.4548739433319628	1.2493978466017505e-05	0.0
cage_30	12	F	TG	0.01329872284032618	0.03296740567434731	0.12513569533906535	0.534247695538448	5.320826973868725e-05	0.0
cage_30	13	F	TG	0.012210155225144792	0.03014517153703833	0.13972627439908264	0.47008346559281666	9.352498890507127e-06	0.0
cage_30	14	F	TG	0.01647246464518456	0.03113865817161795	0.11073770509387962	0.4080920848218499	3.955639964310735e-05	0.0
cage_30	15	F	TG	0.011997400172055367	0.026398557171241788	0.11711000553795028	0.2784977023000538	3.443539028957221e-05	0.0
cage_30	16	F	TG	0.011266975443943885	0.029081389078408716	0.15733412563316249	0.36571927653765257	6.270889659573834e-05	0.006536785525546878
cage_30	17	F	TG	0.01442657169699142	0.02937155960191153	0.22875206219092234	0.4364250773858008	0.0002330691258808276	0.049407261892480486
cage_30	18	F	TG	0.008657145609601426	0.026849911365201325	0.32022785779124957	0.5695034170666953	0.0002488391626489634	0.04615468887646468
cage_30	19	F	TG	0.008549222665094029	0.026596540266543293	0.516885365437041	0.692008764113505	0.0010010168072308377	0.2495131457292652
cage_30	20	F	TG	0.014670879834605535	0.024512735526632794	0.8008475027262957	0.9134624296168913	0.0033988009360023503	0.5455759990256316
cage_30	21	F	TG	0.016215568519383324	0.026441753626770464	0.8517341710276028	1.0428123459078695	0.004408399448921611	0.5218095988980752
cage_30	22	F	TG	0.015979384801822122	0.023817571742870892	0.896327351143651	0.9584647406030079	0.004621868492024908	0.6205440498986637
cage_30	23	F	TG	0.016464312208786046	0.022957530378492092	0.8042759299861049	0.9427946115029234	0.0042497486809428475	0.6298767458677328
cage_30	24	F	TG	0.008943947439998663	0.01557918576802138	0.5750545974636966	0.9574377500407563	0.0014454401362112186	0.3133860908313763
cage_31	7	M	WT	0.01383779272585886	0.039931094361407134	0.1594963836141668	0.8915594042483921	5.226205655303213e-05	0.0
cage_31	8	M	WT	0.01768086084765768	0.042440975823332984	0.1755911889337711	0.8106896546899927	0.00021660010502292775	0.0301391371266347
cage_31	9	M	WT	0.01025183184334327	0.034631207761458595	0.20267230057347335	0.9242517098166549	3.127795907686117e-05	0.0
cage_31	10	M	WT	0.012757411422590716	0.035389142420328375	0.21173467888300962	0.6220957562534196	0.0001505720091982778	0.0
cage_31	11	M	WT	0.010481429151507677	0.03992604693826911	0.18617504444423877	0.7860118071223104	9.419596773882262e-05	0.0
cage_31	12	M	WT	0.009465045413549908	0.03457759757198015	0.14767192422275888	0.8325932088129393	2.1904708652387164e-05	0.0
cage_31	13	M	WT	0.009596068289883746	0.03835621481646657	0.17728399757722335	0.8493140646400527	0.0001374407699592032	0.027764864101383808
cage_31	14	M	WT	0.014514587033938651	0.03172406314359188	0.18761132604006275	0.8306048297538727	0.00011277261250818334	0.05357003534727183
cage_31	15	M	WT	0.010980536275230747	0.03370464372572213	0.2014548169534647	0.7858529985569351	0.00020964394910851568	0.03635095954737545
cage_31	16	M	WT	0.01117451111941852	0.03167278762468663	0.2008837827336176	0.5723295173263931	7.219864297452951e-05	0.022109819851152072
cage_31	17	M	WT	0.014360132100712955	0.0339975826632131	0.1922152408026446	0.6729839049870661	0.00020431401702114137	0.009376791285241224
cage_31	18	M	WT	0.01124107701781546	0.02823366757078259	0.18926446501608	0.6994216417753396	0.00014131807536180724	0.00724751865662313
cage_31	19	M	WT	0.009322143591086303	0.030098958747239137	0.20110022388699836	0.6607919510914615	5.209371843327464e-05	0.0
cage_31	20	M	WT	0.012085695380794672	0.02551988667529419	0.18156687738100796	0.6038034763357204	0.0001126993289775116	0.0
cage_31	21	M	WT	0.01488223734182987	0.028468583723231477	0.2474315981664837	0.4545917778932177	0.00035532994854433963	0.027970077683859118
cage_31	22	M	WT	0.008638472242635135	0.02497649407340777	0.2740723081988168	0.46299135747037207	0.00019028748670806486	0.05177241896067445
cage_31	23	M	WT	0.005051198745911152	0.01659477544301893	0.22298603422864036	0.3776977777936554	0.00010386370525750849	0.00896390880390377
cage_31	24	M	WT	0.004854533816780381	0.01542665521320706	0.1957452165704301	0.46004838198706993	3.9776503724095835e-05	0.0
cage_32	7	M	TG	0.010029213737866163	0.02342728247680399	0.14439977486781178	0.6975927027590293	7.436320533313291e-05	0.006803665753375861
cage_32	8	M	TG	0.011312316765401266	0.028939973934851565	0.13804610933172604	0.6764842648904813	1.876645171671476e-05	0.0
cage_32	9	M	TG	0.012990137870351118	0.03787465399614515	0.11725523835726474	0.7008088595126699	0.00012397509705492618	0.02703672957881122
cage_32	10	M	TG	0.01368808677803097	0.03439745847419611	0.15094947121245159	0.562844801453331	0.0001016898310400627	0.02659701163741086
cage_32	11	M	TG	0.015792081003741954	0.03364165532418441	0.14256483093225872	0.6546564231403379	9.924913581800905e-05	0.0
cage_32	12	M	TG	0.020901601153220012	0.03226595359564734	0.25248332592129985	0.4676962045901521	0.00035007387367483697	0.2235983149350588
cage_32	13	M	TG	0.0162387638741999	0.032887788648118685	0.15840599856627666	0.6204420779169523	0.0002109817050794424	0.03926715390114855
cage_32	14	M	TG	0.024426476732538463	0.027937679770395886	0.23457134196931725	0.6987386182497889	0.00019637835676731587	0.042482041604798335
cage_32	15	M	TG	0.017854098912723614	0.02437231233806919	0.21756771871203334	0.4787218398473249	0.0003807345316821944	0.1508668588697938
cage_32	16	M	TG	0.020558534666702984	0.025872408652211677	0.26009395067060126	0.5147747213186017	0.0005718577534420935	0.16648337969060467
cage_32	17	M	TG	0.02436979035827556	0.031208281307344328	0.4008087182716475	0.9899169492992256	0.0009573461324761244	0.2196853082751995
cage_32	18	M	TG	0.029982793284295015	0.02506948857783328	0.6912451394298379	0.8847390222424505	0.0041446562343530145	0.7863318292809929
cage_32	19	M	TG	0.0147652078441183	0.030378868184678304	0.8008928829027031	0.9297406629302303	0.0033762636994312638	0.7267297232689044
cage_32	20	M	TG	0.019314308636930563	0.027944940610581594	0.9394274957901813	1.0468568606675612	0.006719675044897054	1.0399429352001632
cage_32	21	M	TG	0.017023978046643407	0.025140446307190013	0.9788845883669735	1.0098954168547212	0.006597551470678114	0.8708490118360054
cage_32	22	M	TG	0.012340259382360235	0.022502168820580214	0.8416581500914564	1.0240497794688592	0.0028042149300097075	0.5093083446927102
cage_32	23	M	TG	0.012572429073118572	0.017843941143605862	0.8326239694771	0.9732626112224524	0.0035828017950137983	0.7605356225621621
cage_32	24	M	TG	0.005143537186748947	0.008267165170559152	0.5740616502543341	0.6224105115825401	0.0007743604502868878	0.08329066142757273
cage_33	7	M	WT	0.010136431376451514	0.03978962410801378	0.14220719051316252	0.7280374220871163	1.3636111981700215e-05	0.0
cage_33	8	M	WT	0.007376483805494796	0.02956376919778922	0.15864860056921426	0.5914716612732083	6.256509013861954e-06	0.0
cage_33	9	M	WT	0.010683475947331206	0.03847174966442916	0.18915355809023884	1.0255487129594747	9.8578707608168e-05	0.025509928707487296
cage_33	10	M	WT	0.010781889458423712	0.030863867074839235	0.18296283521482573	0.788919295690533	3.5553419365254786e-05	0.0
cage_33	11	M	WT	0.005471904272614778	0.03667494314384118	0.14831238852696618	0.8255706510576599	1.0405829870117005e-05	0.0
cage_33	12	M	WT	0.005815453568469295	0.02795870473110754	0.1339284799001484	0.8637027871761338	4.20437866927593e-06	0.0
cage_33	13	M	WT	0.006748097971061935	0.03573432078873638	0.1317493807351505	0.7156783775688019	3.9585056857380974e-05	0.0
cage_33	14	M	WT	0.010767682879409097	0.031829607302953526	0.13145898401963071	0.8845890042957254	4.075165472643857e-05	0.0
cage_33	15	M	WT	0.005950124345518713	0.027168643716122504	0.14988498496710181	0.6141779388387636	5.004900483624369e-05	0.0
cage_33	16	M	WT	0.008153217180876401	0.028191147520038422	0.17323734112623357	0.5601548316955656	3.542073706470743e-05	0.0
cage_33	17	M	WT	0.0070191199336882455	0.02812591598970008	0.1363422292497888	0.5869709477314442	2.729773675019509e-05	0.0
cage_33	18	M	WT	0.00616637832053743	0.021957405461989103	0.16092148087115893	0.5720509550031095	1.7726693007511612e-05	0.0
cage_33	19	M	WT	0.004384170359594535	0.0262975727651256	0.12082643616423268	0.6164898598791562	4.1708375041708385e-06	0.0
cage_33	20	M	WT	0.007094883865608407	0.02338500020676077	0.18940766418821586	0.5926115862671605	0.00018219269054778282	0.04134193722335686
cage_33	21	M	WT	0.009213595316180712	0.02452051956658757	0.18697687363158313	0.5472036418820971	0.00011444553237705513	0.0
cage_33	22	M	WT	0.007425003719589147	0.023981072771347985	0.15997970466834727	0.44448594237148065	6.47700422606879e-05	0.0
cage_33	23	M	WT	0.009484544220345887	0.02550976927381936	0.20578549825484177	0.5057855515600769	0.0001235350884299794	0.0
cage_33	24	M	WT	0.009314253286051021	0.026901046608028525	0.14239536949860207	0.6190129396508438	3.739672814716516e-05	0.0
cage_34	7	F	TG	0.0077128863850007045	0.030033502771771976	0.13442637216399533	0.6955981684617246	3.232035271162508e-05	0.0
cage_34	8	F	TG	0.007669628568572766	0.03232049174175767	0.12755695742873255	0.5127193587801477	1.7732082697736113e-05	0.0
cage_34	9	F	TG	0.007293694359860226	0.02642971009492217	0.12329533103339643	0.5794165136073042	0.0	0.0
cage_34	10	F	TG	0.008933569347521826	0.03050865913006106	0.16749663114363442	0.4980759144931556	4.989810975871165e-05	0.006803665753375861
cage_34	11	F	TG	0.006332892259524621	0.03268301963579564	0.14169834076003401	0.5612735846398581	2.7186604869161184e-05	0.0
cage_34	12	F	TG	0.006937709942273174	0.030849582320807593	0.13611257833313004	0.5617033199816983	1.143749098700885e-05	0.0
cage_34	13	F	TG	0.006634605583127916	0.028970828072275835	0.1319439672179491	0.5271517162549035	2.497489949683757e-05	0.0
cage_34	14	F	TG	0.013720627288464298	0.02987200575799937	0.16208417572565242	0.44187322221499414	5.836465643550944e-05	0.0
cage_34	15	F	TG	0.009288383593381216	0.03100534780297978	0.12581584897147285	0.547546034952479	3.649264811601435e-05	0.0
cage_34	16	F	TG	0.00998784873956787	0.02905202858955632	0.2722875696494894	0.5711038677348672	0.00024535141298458017	0.0639303994764428
cage_34	17	F	TG	0.010567083751033287	0.029018222669796773	0.38431960120986847	0.5696275625674707	0.0005366171565868207	0.21048872253491094
cage_34	18	F	TG	0.014781372021090748	0.030065563954407452	0.49739016599753877	0.7332902216204804	0.0013394683955838694	0.2270895913284809
cage_34	19	F	TG	0.009777694381793394	0.024782763158592572	0.6185011580047928	0.8937884651180388	0.0012564910532778578	0.4083492185754855
cage_34	20	F	TG	0.016690902065539165	0.030699188349060342	1.0050841601435658	0.9472390531313533	0.004391795243936305	0.8515331465327535
cage_34	21	F	TG	0.018719545343497738	0.02556646514168759	0.9054866741416265	0.9885879611724931	0.0048163705137680545	0.4533038671976719
cage_34	22	F	TG	0.013647570063270395	0.021511229929491647	0.7557510369876759	0.8020680582285175	0.0030611171991671827	0.5714259755990069
cage_34	23	F	TG	0.013748192698034832	0.018327919519379145	0.6027560255482985	0.8440466012520983	0.0016535920581560613	0.2435696229279368
cage_34	24	F	TG	0.004429536535262726	0.0074248017914246645	0.42153044778481863	0.5732980186833009	0.00029292759414683363	0.035515378348349516
cage_35	7	F	WT	0.013608191766339964	0.04555220864186229	0.22163106740853575	0.8593352472618817	6.2713092470580325e-06	0.0
cage_35	8	F	WT	0.011182955362103316	0.039584560829341475	0.18320863114410654	0.8036197911161407	0.00012009983857844634	0.007938008164875764
cage_35	9	F	WT	0.0112911109014257	0.048756124160049534	0.17537857093855586	1.0102889745913513	5.7272894394876415e-05	0.0
cage_35	10	F	WT	0.010813794511414933	0.046096109753228955	0.14128748673381436	0.8862235886920119	4.4906393561584364e-05	0.021084114728563492
cage_35	11	F	WT	0.008855165498604402	0.049676634945158935	0.14798271715106154	0.6826622265225729	1.9673402917882506e-05	0.0
cage_35	12	F	WT	0.009614191727053878	0.04744786431520476	0.15898721893825524	0.6544749168211703	3.014614259998064e-05	0.0
cage_35	13	F	WT	0.009066432710955781	0.048678069636659715	0.13225666309198975	0.5990325164996921	2.075165331891789e-05	0.0
cage_35	14	F	WT	0.013240086594307254	0.04029084562577915	0.14535960862057737	0.6254593462616115	6.787802249708516e-05	0.0
cage_35	15	F	WT	0.007889540594182762	0.034521225481259174	0.17375879574940603	0.5094931096182364	6.444858502196668e-05	0.0
cage_35	16	F	WT	0.007754854285031626	0.03052470843314159	0.1910868449430094	0.49018369621728214	9.914399064137996e-05	0.0059530137670132065
cage_35	17	F	WT	0.007533600402698599	0.027761533999494683	0.16813103574413332	0.5226270357953292	1.660903835622284e-05	0.0
cage_35	18	F	WT	0.007383725832541168	0.028849479261690483	0.1614118848803082	0.6423374319521683	5.632478149585714e-05	0.0
cage_35	19	F	WT	0.0071224435371579605	0.04366784044946204	0.16835286637368668	0.7389318367573022	4.474441013947045e-05	0.0155790991966403
cage_35	20	F	WT	0.008506913773413489	0.03280131907906045	0.21234064246010012	0.6209453332994522	6.594740719244485e-05	0.0216129705514221
cage_35	21	F	WT	0.012452299141697014	0.03706630421231912	0.24661672869530246	0.3584639657875986	8.130494712788848e-05	0.0
cage_35	22	F	WT	0.010019863218059493	0.03968689332098076	0.26185291372643876	0.7269728454146799	0.0003967824383749435	0.1615667595313506
cage_35	23	F	WT	0.013113054917934226	0.03372011224323323	0.20891833637751642	0.5007116621341485	0.00024776340101462593	0.06840285128636614
cage_35	24	F	WT	0.011086424361214944	0.03575796588939282	0.21140263495511472	0.4619006085500211	0.00010533185232620996	0.0
cage_36	7	F	WT	0.010945387191710005	0.034331889415101284	0.13057032961256623	0.7339654888997128	1.7662108292066566e-05	0.0
cage_36	8	F	WT	0.008469217410432373	0.030636488360229416	0.16604862257602906	0.6325063474475766	1.987473984955434e-05	0.0
cage_36	9	F	WT	0.009788898333030214	0.031293773822808166	0.14336275206762775	0.7900279883568313	3.33701502557799e-05	0.0
cage_36	10	F	WT	0.011882126495155342	0.03177110833273315	0.13171605932661232	0.7219898640733889	6.024404148758772e-05	0.0
cage_36	11	F	WT	0.00793925377083296	0.032948945120058463	0.1376496221460613	0.5318621456130989	4.0842198175676396e-05	0.0
cage_36	12	F	WT	0.007459845608983512	0.030203403761226467	0.1430042743123308	0.6447777284823617	4.0594725862493306e-05	0.0
cage_36	13	F	WT	0.008286883796388117	0.03198023410146621	0.1401029899219339	0.5370686922793865	7.486595698337255e-05	0.0
cage_36	14	F	WT	0.013087963815019596	0.030564522894560856	0.13337498152670904	0.472854169187691	4.9136263189720755e-05	0.0
cage_36	15	F	WT	0.009683830525284704	0.027204293144970478	0.1470303200023449	0.32602175871900235	5.748173724018293e-05	0.022109819851152072
cage_36	16	F	WT	0.00976163931147399	0.023732914418607635	0.13078961229473213	0.4984949912731515	1.6675305186209565e-05	0.0
cage_36	17	F	WT	0.010432371533311594	0.02869442238097445	0.12882815268288558	0.44179099699705227	5.9387937270437294e-05	0.0
cage_36	18	F	WT	0.012426717941492737	0.024114679593055383	0.14169013399595856	0.4038671762091804	6.360162963270199e-05	0.0
cage_36	19	F	WT	0.010843749678624823	0.03048902132408118	0.1387118622062867	0.3941930896850354	1.6632754908852907e-05	0.0
cage_36	20	F	WT	0.013516260874513762	0.025440729514806987	0.14646556681297504	0.46700095213410897	3.032082497918985e-05	0.0
cage_36	21	F	WT	0.016500119904024845	0.025675638396764306	0.14253809633651346	0.2728835594798982	5.2078309747358e-05	0.0
cage_36	22	F	WT	0.013304070091961925	0.026734799814362577	0.16689675991208058	0.6108150340004688	4.2763226731709854e-05	0.0
cage_36	23	F	WT	0.01263649892981908	0.02720605389792973	0.1479112625118344	0.3776479206156304	0.000110592713326967	0.008131694028238675
cage_36	24	F	WT	0.010259041448348168	0.024327798314868834	0.18296035623125295	0.29260978752148387	4.791119505504489e-05	0.0
cage_37	7	M	TG	0.01129948322970127	0.03161530498928179	0.2506961975623147	0.768413065872125	0.00039931449482960113	0.10328403370335387
cage_37	8	M	TG	0.010438748819487552	0.03736109713954255	0.16590869902190555	0.8531160645340944	0.0001008162757981214	0.03906678430647405
cage_37	9	M	TG	0.009871935450746478	0.03724856651709309	0.15743918451279112	0.8508825146938348	0.00019706503016491336	0.02276464082878135
cage_37	10	M	TG	0.012446522234323536	0.032640064618872276	0.17008652032105145	0.7764179642419803	5.547153160908046e-05	0.02897448830049706
cage_37	11	M	TG	0.0106978155823282	0.034222548372869095	0.19215994825425847	0.6723025108907965	9.843229290230032e-05	0.006173545280058183
cage_37	12	M	TG	0.010922694923116203	0.03086369364467325	0.18557334065217582	0.5905990777652353	7.507483039772174e-05	0.0
cage_37	13	M	TG	0.009628075729595604	0.031784251515658384	0.1821710975703157	0.7149556074047252	4.044752009510114e-05	0.0
cage_37	14	M	TG	0.014597778011122428	0.029604811978694103	0.1874635400886207	0.5671941487162782	0.00032773408933645115	0.010104103636072477
cage_37	15	M	TG	0.012480411427251781	0.030946667899156264	0.21512116289111585	0.5467236191746297	0.00023993871487731832	0.08513760396099845
cage_37	16	M	TG	0.013873198426134449	0.027430438059584523	0.24913496021834186	0.7270116912869439	0.0004954110820740949	0.04567850876330296
cage_37	17	M	TG	0.013856321991879514	0.030695609311416846	0.4842377448613834	0.843743215413611	0.0014339601122112802	0.6174418830103351
cage_37	18	M	TG	0.01602343188270164	0.03429430331290874	0.6089863313235888	0.9405706009624473	0.002090106507535123	0.4267649832799043
cage_37	19	M	TG	0.012397691314774958	0.034077136715520866	0.8654773052457571	1.0649247810084836	0.003488264281526598	0.6577896498312995
cage_37	20	M	TG	0.015027297630406283	0.025132225456990794	0.8998908453505298	1.0078096821283389	0.005316229199366082	0.8813895376341362
cage_37	21	M	TG	0.00983235410055872	0.018554278848839183	0.724404567161285	0.873953712786747	0.0032585027446022123	0.3954009872525153
cage_37	22	M	TG	0.0041367864892473015	0.008825136501772591	0.44149284491402563	0.7121450944370309	0.00022706679679700278	0.09116061082972043
cage_37	23	M	TG	0.0007525979875046202	0.0013862046861507602	0.06349157402483778	0.2098819833891869	0.0	0.0
cage_38	7	M	TG	0.02046512010165545	0.03175795858346168	0.1499887871970551	0.6065212829520779	2.3979155315892182e-05	0.0
cage_38	8	M	TG	0.021340239179889173	0.03458659998884982	0.19970238917976627	0.6710385856145537	9.782356276465e-05	0.01015026955668528
cage_38	9	M	TG	0.02101701879788311	0.040535357348517584	0.19732886508533434	0.6317545122710507	0.00012038755485279053	0.0
cage_38	10	M	TG	0.020473131872451103	0.039065656226810096	0.19608378781604666	0.8052705455215508	5.302245384444007e-05	0.0
cage_38	11	M	TG	0.020495711299032004	0.04243786508520204	0.2055415671981538	0.5979366265698164	0.00021408946815456296	0.07624441827954491
cage_38	12	M	TG	0.020453958575181244	0.03609600640172844	0.16902200033909762	0.6738712105932966	8.034862090114854e-05	0.0
cage_38	13	M	TG	0.02482654807214603	0.034506672758255606	0.20968927953519967	0.6364929470938824	0.0003661821206035262	0.11040473469354743
cage_38	14	M	TG	0.03647107946689012	0.0380063097817663	0.2876712281913411	0.4983064254789501	0.00029355591283593404	0.11023308037422752
cage_38	15	M	TG	0.02769497931124947	0.03176419344417273	0.29190834695175644	0.5982191606423565	0.0002971423222091364	0.062629102782588
cage_38	16	M	TG	0.030163333922626722	0.031596438526366476	0.5490342954674416	0.7471061922029015	0.0021916513077645545	0.5324501254597652
cage_38	17	M	TG	0.02503968088718968	0.040220731405061064	0.7710775886388689	0.9686665271534097	0.0031546900888651977	0.5187726657825535
cage_38	18	M	TG	0.019014009842163126	0.029576291970330845	0.6591516983298852	0.9329735074029982	0.002359248549001727	0.7112127111790191
cage_38	19	M	TG	0.0142194109153979	0.0285206863624132	0.8597788596983101	0.9474278846653446	0.0035640217476816624	0.4456240855679796
cage_38	20	M	TG	0.016127702411533558	0.018976771909403636	0.8665642943451485	0.96060013812337	0.0042007942176932565	0.6997344221419556
cage_38	21	M	TG	0.01320138841534464	0.014833267667868548	0.9143262947246891	0.8297907556614559	0.004460275432379656	0.7664504247125284
cage_38	22	M	TG	0.008356046123549132	0.008948669059760604	0.7026933322910154	0.624552481041375	0.0026722770739685212	0.2907669445960376
cage_38	23	M	TG	0.00339254397998456	0.0075771635034695296	0.4489095941551157	0.5702275568337637	0.00030368541663786916	0.0855468524263333
